# Supplementary material for: Non-covalent ligand-oxide interaction promotes oxygen evolution
Source: Springer Nature journal article supplement (doi:10.1038/s41467-023-36718-3), 2023-02-22
Supplement: MOESM1 [file 41467_2023_36718_MOESM1_ESM.pdf]

## Supplementary Information

### Non-covalent ligand-oxide interaction promotes oxygen evolution

Qianbao Wu<sup>1, ‡</sup>, Junwu Liang<sup>2, ‡</sup>, Mengjun Xiao<sup>1, ‡</sup>, Chang Long<sup>1</sup>, Lei Li<sup>1</sup>, Zhenhua Zeng<sup>3, \*</sup>,  
Andraž Mavrič<sup>4</sup>, Xia Zheng<sup>1</sup>, Jing Zhu<sup>5</sup>, Hai-Wei Liang<sup>6</sup>, Hongfei Liu<sup>1</sup>, Matjaz Valant<sup>4</sup>,  
Wei Wang<sup>7</sup>, Zhengxing Lv<sup>8</sup>, Jiong Li<sup>8</sup>, Chunhua Cui<sup>1, \*</sup>

<sup>1</sup>Molecular Electrochemistry Laboratory, Institute of Fundamental and Frontier Sciences, University of Electronic Science and Technology of China, Chengdu, 610054, China.

<sup>2</sup>Optoelectronic Information Research Center, School of Physics and Telecommunication Engineering, Yulin Normal University, Yulin, Guangxi, 537000, China.

<sup>3</sup>Davidson School of Chemical Engineering, Purdue University, West Lafayette, Indiana 47907, United States.

<sup>4</sup>Materials Research Laboratory, University of Nova Gorica, Vipavska 13, SI-5000 Nova Gorica, Slovenia.

<sup>5</sup>Department of Chemical Physics, School of Chemistry and Materials Science, University of Science and Technology of China, Hefei, 230026, China.

<sup>6</sup>Hefei National Laboratory for Physical Sciences at the Microscale, Department of Chemistry, University of Science and Technology of China, Hefei, 230026, China.

<sup>7</sup>School of Materials and Energy, University of Electronic Science and Technology of China, Chengdu, 610054, China.

<sup>8</sup>Shanghai Synchrotron Radiation Facility, Shanghai Advanced Research Institute, Chinese Academy of Sciences, Shanghai, 201210 P. R. China

\*E-mail: zeng46@purdue.edu, chunhua.cui@uestc.edu.cn

‡These authors contribute equally

#### **This file concludes:**

Supplementary Fig. 1 to 69

Supplementary Table 1 to 10

Supplementary References 1 to 44

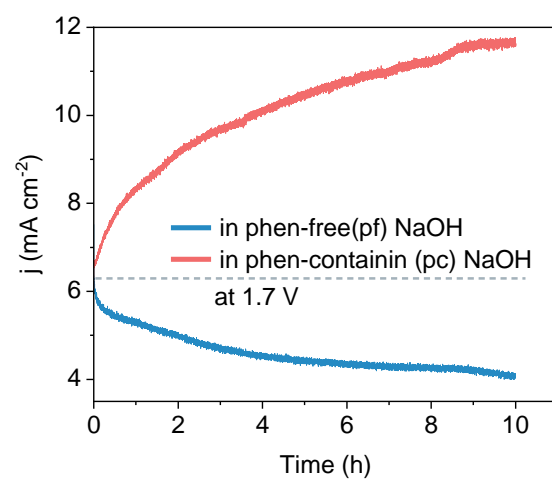

**Supplementary Fig. 1 |  $j$ - $t$  curves.** The  $j$ - $t$  curves of as-prepared CoOOH on FTO at 1.7 V<sub>RHE</sub> in phen-free (pf-) and phen-containing (pc-) (7 mM) 1.0 M NaOH electrolytes.

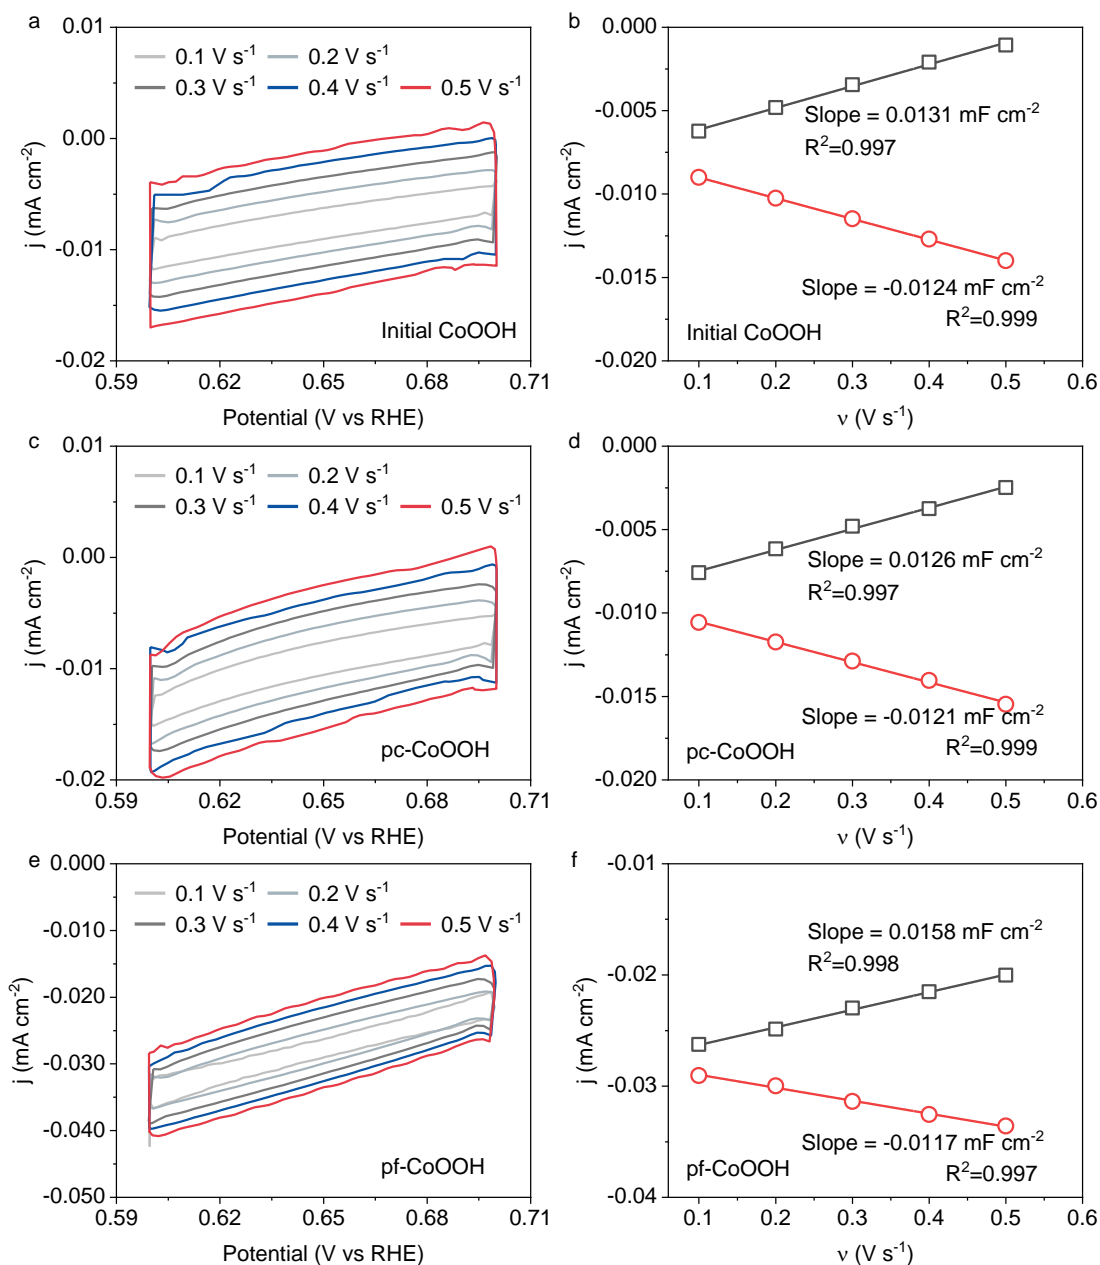

**Supplementary Fig. 2 | Double-layer capacitance measurements.** CV curves in 1.0 M NaOH of (a) pristine CoOOH, (c) pc-CoOOH, and (e) pf-CoOOH in a non-Faradic region (0.6 ~ 0.7 V) with a scan rate of 0.1 V s<sup>-1</sup> to 0.5 V s<sup>-1</sup>. Liner fitting of the cathodic and anodic charging current density at 0.65 V<sub>RHE</sub> of (b) pristine CoOOH, (d) pc-CoOOH, and (f) pf-CoOOH as a function of scan rate. The pf-CoOOH and pc-CoOOH on FTO were obtained after 10 h chronoamperometry treatments of pristine CoOOH at 1.7 V<sub>RHE</sub> in phen-free and phen-containing 1.0 M NaOH, respectively.

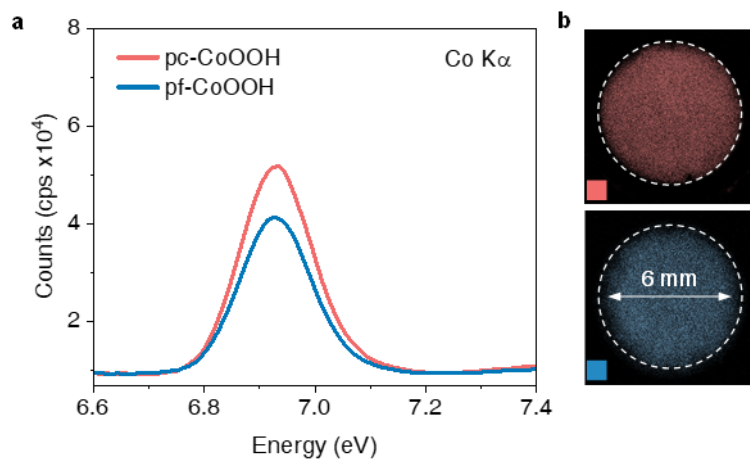

**Supplementary Fig. 3 | XRF data.** (a) The counts of Co K $\alpha$  emission and (b) the corresponding Co K $\alpha$  mapping of pc-CoOOH and pf-CoOOH on FTO electrodes by XRF. The pf-CoOOH and pc-CoOOH on FTO were obtained after 10 h chronoamperometry treatments of pristine CoOOH at 1.7 V<sub>RHE</sub> in phen-free and phen-containing 1.0 M NaOH, respectively.

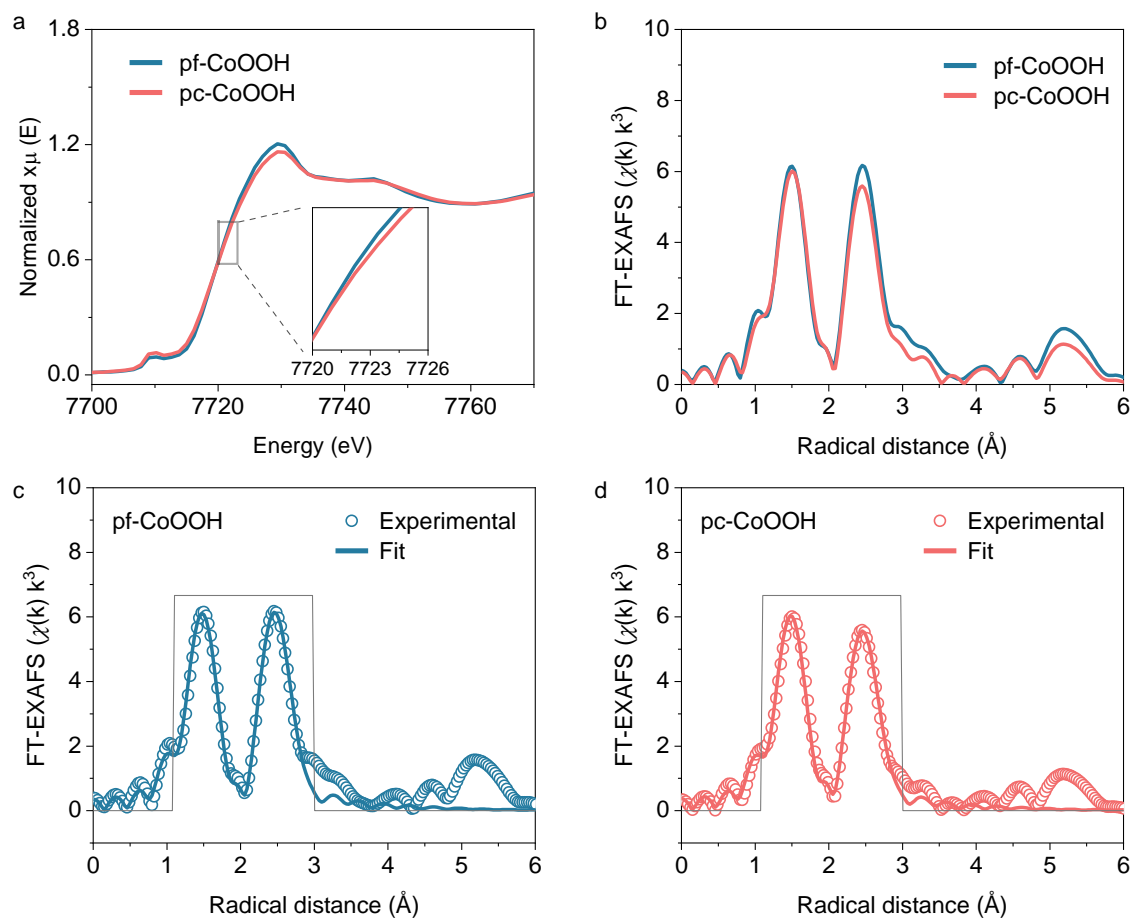

**Supplementary Fig. 4 | XAFS data.** (a) Co K-edge XANES spectra of as-prepared pf-CoOOH and pc-CoOOH, and (b) the corresponding  $k^3$ -weighted Fourier-transformed EXAFS. (c) Fitting curves of Co K-edge EXAFS in R spaces for pf-CoOOH and (d) for pc-CoOOH. The pf-CoOOH and pc-CoOOH were obtained after 10 h chronoamperometry treatments of pristine CoOOH at 1.7 V<sub>RHE</sub> in phen-free and phen-containing 1.0 M NaOH, respectively.

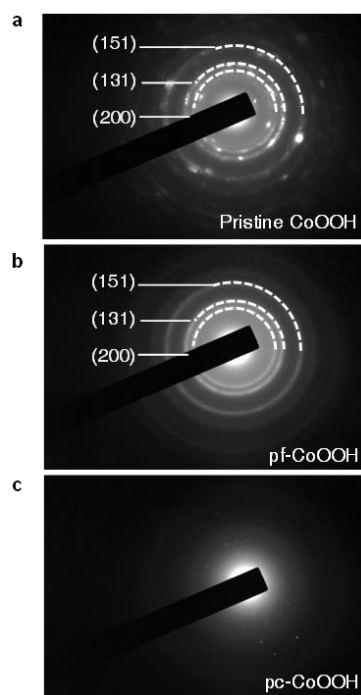

**Supplementary Fig. 5 | SAED images. (a)** Pristine CoOOH. **(b)** pf-CoOOH. **(c)** pc-CoOOH. The pf-CoOOH and pc-CoOOH were obtained after 10 h chronoamperometry treatments of pristine CoOOH at 1.7 V<sub>RHE</sub> in phen-free and phen-containing 1.0 M NaOH, respectively.

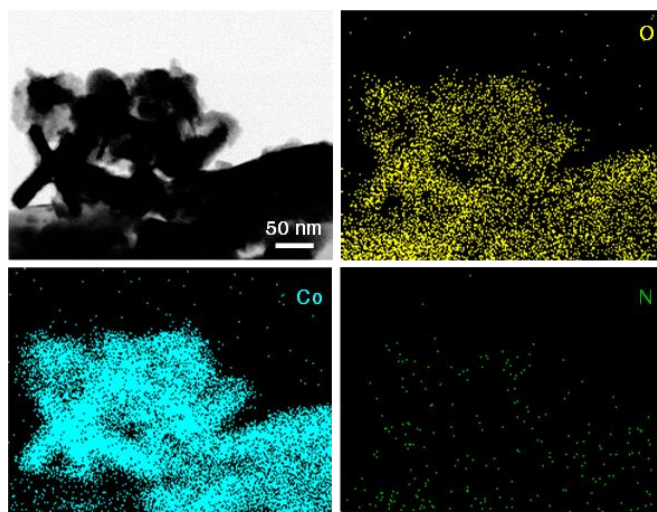

**Supplementary Fig. 6 | TEM image and element mapping.** The TEM and element mapping of pc-CoOOH. The pc-CoOOH was obtained after 10 h chronoamperometry treatments of pristine CoOOH at 1.7 V<sub>RHE</sub> in phen-containing 1.0 M NaOH.

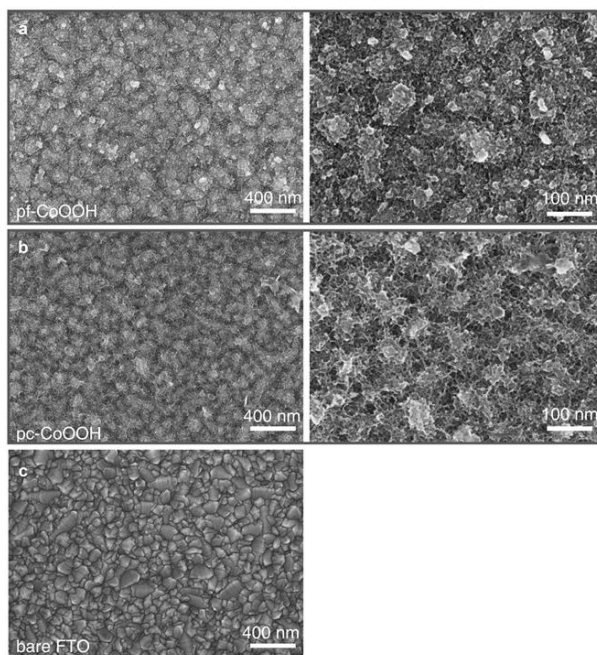

**Supplementary Fig. 7 | SEM images.** The morphology of (a) pf-CoOOH and (b) pc-CoOOH. The pf-CoOOH and pc-CoOOH were obtained after 10 h chronoamperometry treatments of pristine CoOOH at 1.7 V<sub>RHE</sub> in phen-free and phen-containing 1.0 M NaOH, respectively. (c) bare FTO. The pf-CoOOH and pc-CoOOH films demonstrate a slight difference in surface texture.



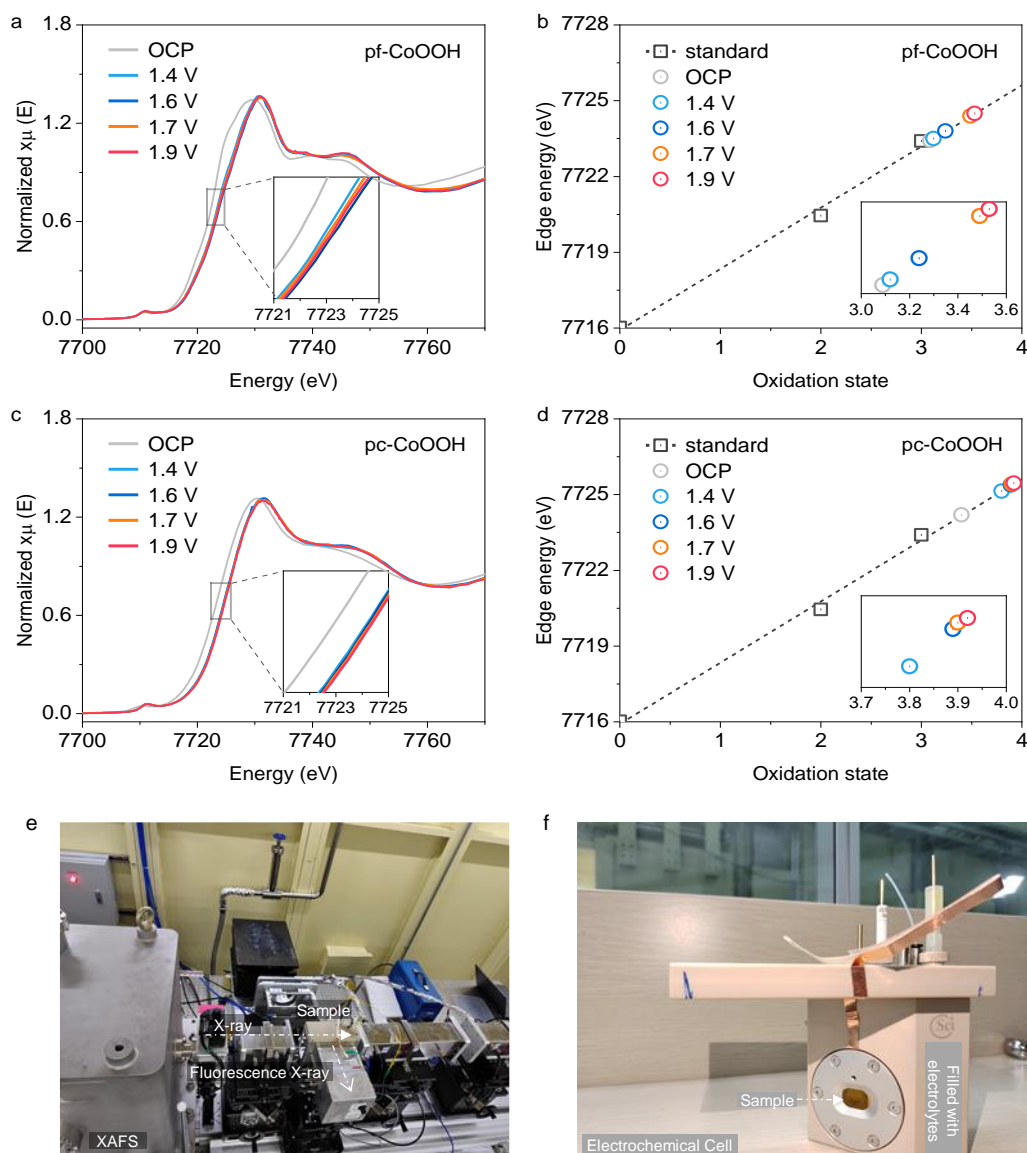

**Supplementary Fig. 8 | In-situ XAFS data.** (a) Co K-edge XANES of pf-CoOOH different potentials. (b) The corresponding linear fit of Co oxidation state for pf-CoOOH. (c) Co K-edge XANES of pc-CoOOH different potentials. (d) The corresponding linear fit of Co oxidation state for pc-CoOOH. The pf-CoOOH and pc-CoOOH on carbon paper were obtained after 10 h chronoamperometry treatments of pristine CoOOH at 1.7 V<sub>RHE</sub> in phen-free and phen-containing 1.0 M NaOH, respectively. The images of (e) the in-situ XAFS equipment and (f) the electrochemical cell. Reference spectra include those of Co foil, CoO, and Co<sub>2</sub>O<sub>3</sub> in Supplementary Fig. 9.

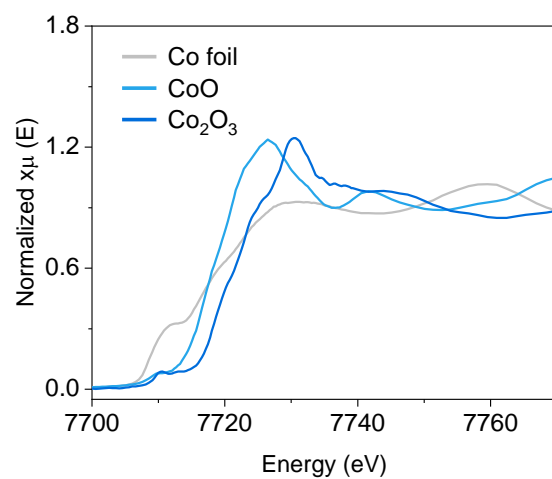

**Supplementary Fig. 9 | XAFS data.** Co K-edge XANES of Co foil, CoO, and Co<sub>2</sub>O<sub>3</sub>.

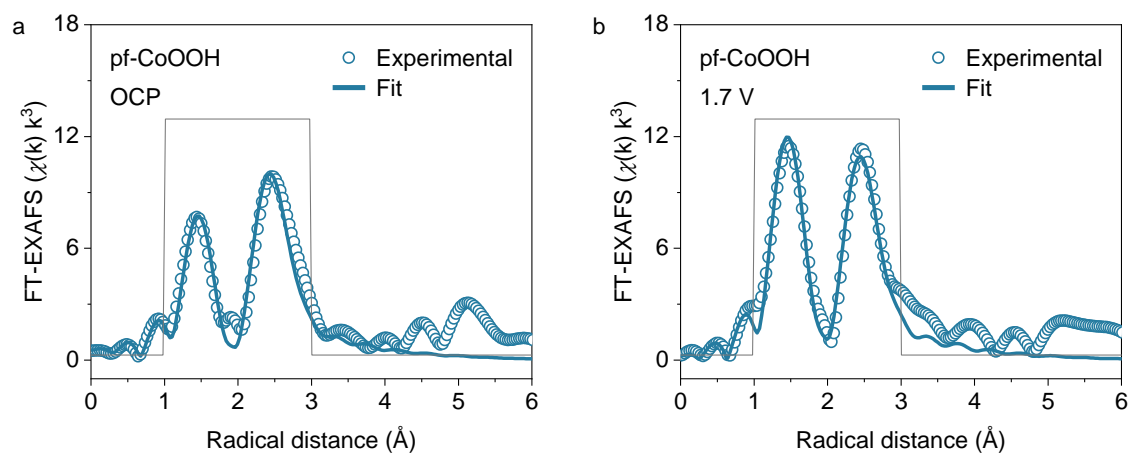

**Supplementary Fig. 10 | Fitting curves of Fourier transformed  $k^3$ -weighted Co K-edge EXAFS in R spaces for pf-CoOOH.** Fitting curves of Co K-edge EXAFS in R space for pf-CoOOH (a) at OCP and (b) at 1.7 V<sub>RHE</sub>. The pf-CoOOH on carbon paper was obtained after 10 h chronoamperometry treatments of pristine CoOOH at 1.7 V<sub>RHE</sub> in phen-free 1.0 M NaOH.

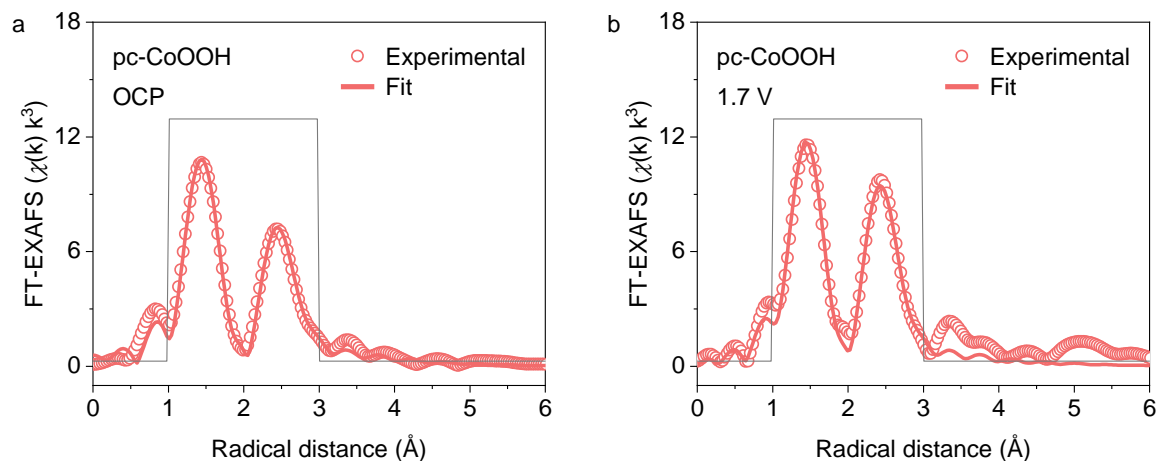

**Supplementary Fig. 11 | Fitting curves of Fourier transformed  $k^3$ -weighted Co K-edge EXAFS in R spaces for pc-CoOOH.** Fitting curves of Co K-edge EXAFS in R space for pc-CoOOH (a) at OCP and (b) at 1.7  $V_{\text{RHE}}$ . The pc-CoOOH on carbon paper was obtained after 10 h chronoamperometry treatments of pristine CoOOH at 1.7  $V_{\text{RHE}}$  in phen-containing 1.0 M NaOH.

**Supplementary Table 1 | The best-fitting parameters for FT-EXAFS in R space of pf-CoOOH and pc-CoOOH.**

| Sample Name | /                    | Path  | C.N.            | $\sigma^2$ ( $10^{-3} \text{ \AA}^2$ ) | R ( $\text{\AA}$ ) | $\Delta E_0$ (eV) | R-factor (%) |
|-------------|----------------------|-------|-----------------|----------------------------------------|--------------------|-------------------|--------------|
| pf-CoOOH    | As-prepared          | Co-O  | 3.84 $\pm$ 0.32 | 3.01 $\pm$ 1.01                        | 1.930              | -0.11 $\pm$ 0.88  | 0.63         |
|             |                      | Co-Co | 3.30 $\pm$ 0.51 | 4.45 $\pm$ 1.18                        | 2.887              |                   |              |
|             | OCP                  | Co-O  | 3.82 $\pm$ 0.12 | 2.33 $\pm$ 0.38                        | 1.909              | -2.79 $\pm$ 2.66  | 3.09         |
|             |                      | Co-Co | 3.20 $\pm$ 0.15 | 1.15 $\pm$ 1.23                        | 2.825              |                   |              |
|             | 1.7 V <sub>RHE</sub> | Co-O  | 4.95 $\pm$ 0.69 | 0.76 $\pm$ 1.6                         | 1.892              | -2.47 $\pm$ 1.43  | 0.91         |
|             |                      | Co-Co | 4.00 $\pm$ 0.02 | 2.26 $\pm$ 0.79                        | 2.832              |                   |              |
| pc-CoOOH    | As-prepared          | Co-O  | 3.62 $\pm$ 0.27 | 2.76 $\pm$ 0.91                        | 1.930              | 0.67 $\pm$ 0.79   | 0.56         |
|             |                      | Co-Co | 2.99 $\pm$ 0.46 | 4.55 $\pm$ 1.18                        | 2.887              |                   |              |
|             | OCP                  | Co-O  | 5.11 $\pm$ 0.07 | 1.16 $\pm$ 0.60                        | 1.893              | -2.31 $\pm$ 1.08  | 0.47         |
|             |                      | Co-Co | 4.07 $\pm$ 1.12 | 5.51 $\pm$ 2.32                        | 2.826              |                   |              |
|             | 1.7 V <sub>RHE</sub> | Co-O  | 6.05 $\pm$ 0.57 | 2.26 $\pm$ 1.11                        | 1.882              | -3.53 $\pm$ 1.00  | 0.50         |
|             |                      | Co-Co | 4.99 $\pm$ 0.18 | 4.88 $\pm$ 0.70                        | 2.831              |                   |              |

C.N.: Coordination number; R: interatomic distance;  $\sigma^2$ : disorder factors;  $\Delta E_0$ : energy shifts. The amplitude factor  $S_0^2$  was determined by fitting standard Co foil with a fixed coordination number based on the known crystal structure.

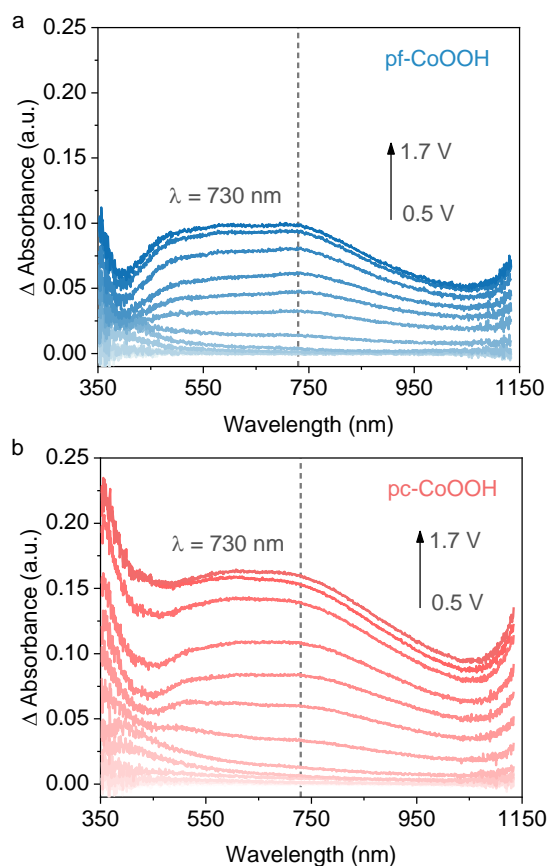

**Supplementary Fig. 12 | In-situ UV-Vis.** Potential-dependent UV-Vis spectra of **(a)** pf-CoOOH and **(b)** pc-CoOOH were recorded from 0.5 to 1.7 V<sub>RHE</sub> in 1.0 M NaOH. The background was deducted at 0.5 V<sub>RHE</sub>. Before the UV-Vis measurements, the films were obtained after 10 h chronoamperometry treatments of pristine CoOOH at 1.7 V<sub>RHE</sub> in phen-free and phen-containing (7 mM) 1.0 M NaOH.

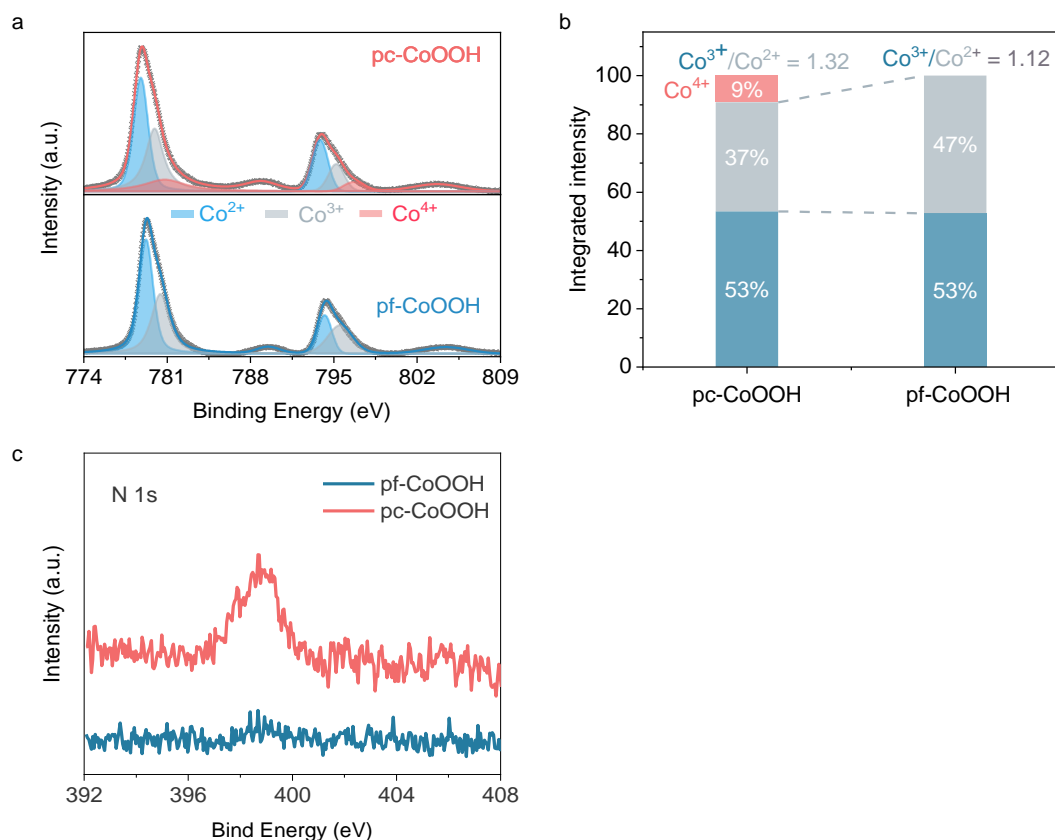

**Supplementary Fig. 13 | XPS of pf-CoOOH and pc-CoOOH.** (a) Co 2p XPS spectra of pf-CoOOH and pc-CoOOH. (b) The ratio of  $\text{Co}^{3+}/\text{Co}^{2+}$  and  $\text{Co}^{4+}$  in pf-CoOOH and pc-CoOOH is determined by the area of the respective peak after Co 2p fitting. (c) The corresponding N 1s XPS. The pf-CoOOH and pc-CoOOH on carbon paper were obtained after 10 h chronoamperometry treatments of pristine CoOOH at 1.7 V<sub>RHE</sub> in phen-free and phen-containing 1.0 M NaOH, respectively.

**Supplementary Table 2 | The composition of pc-CoOOH analyzed by XPS.** The pc-CoOOH on FTO was obtained after 10 h chronoamperometry treatments of pristine CoOOH at 1.7 V<sub>RHE</sub> phen-containing 1.0 M NaOH.

|          | Co 2p  | N 1s   | Co/N |
|----------|--------|--------|------|
| pc-CoOOH | 89.47% | 10.53% | 8.49 |

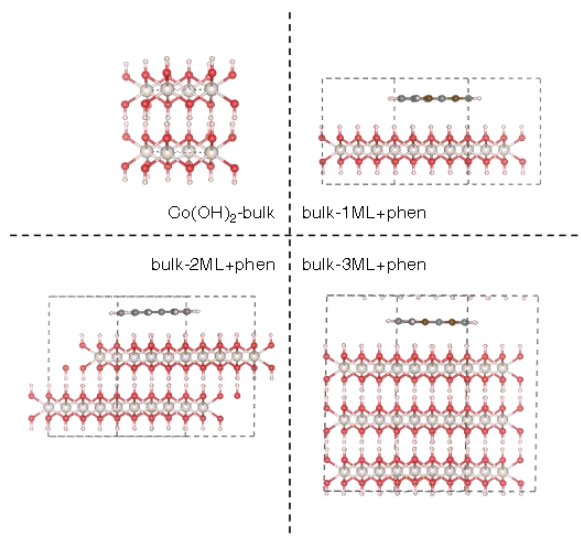

**Supplementary Fig. 14 | DFT models.** The structure schemes of phen-free Co(OH)<sub>2</sub>, high(H)-, middle(M)-, and low(L)-density of phen (i.e., 1 ML, 0.5 ML, and 0.33 ML phen) embedded Co(OH)<sub>2</sub>. ML is the abbreviation of a monolayer.

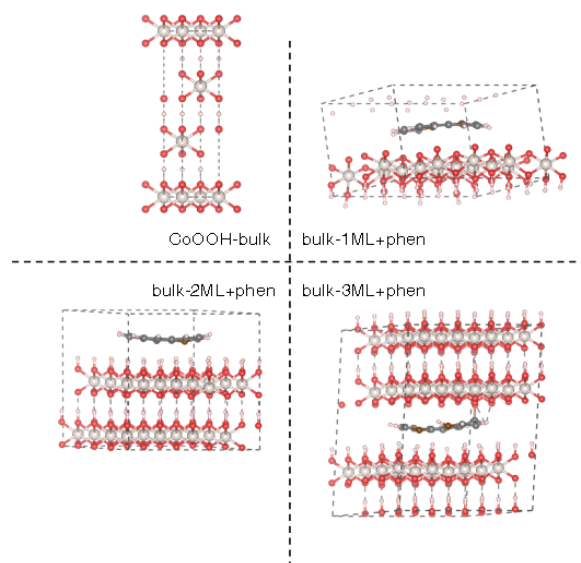

**Supplementary Fig. 15 | DFT models.** The structure schemes of phen-free CoOOH, high(H)-, middle(M)-, and low(L)-density of phen (i.e., 1 ML, 0.5 ML, and 0.33 ML phen) embedded CoOOH. ML is the abbreviation of a monolayer.



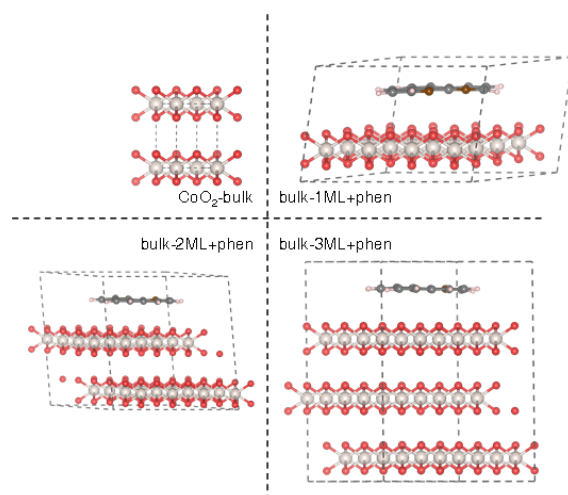

**Supplementary Fig. 16 | DFT models.** The structure schemes of phen-free CoO<sub>2</sub>, high(H)-, middle(M)-, and low(L)-density of phen (i.e., 1 ML, 0.5 ML, and 0.33 ML phen) embedded CoO<sub>2</sub>. ML is the abbreviation of a monolayer.

**Supplementary Table 3 | Thermodynamic correction used in the free energy calculations.**

Zero-point energies are calculated with experimental vibrational data in reference<sup>1,2</sup>, and the integrated heat capacity ( $\delta H^{0\sim 298K}$ ) and entropy at 298.15 K are obtained from reference<sup>3</sup>. For water, the entropy is calculated at 0.035 bar through  $S = S_0 + k_B T \ln(p/p_0)$  to derive the chemical potential of liquid water, because at this pressure gas-phase water is in equilibrium with liquid water at 298.15 K. The solvation energies ( $E_{\text{solv}}$ ) are evaluated from AIMD simulation by filling the vacuum with liquid water with a thickness that is equivalent to 5 water bilayers. It is worth noting that, in comparison with our previous work<sup>4-6</sup>, the solvation energy of surface OH for Co-based hydroxides compounds is about -0.1 eV smaller, because of high OH density in the current case which leads to a very limited amount of hydrogen bonds formed with interface water. And the solvation energy of OH for molecules is about -0.6 eV.

|                     | ZPE (eV) | $\delta H@298K$ (eV) | TS@298K(eV) | $E_{\text{solv}}$ (eV) |
|---------------------|----------|----------------------|-------------|------------------------|
| H <sub>2</sub> O(g) | 0.56     | 0.10                 | 0.68        |                        |
| H <sub>2</sub>      | 0.27     | 0.09                 | 0.40        |                        |
| (O)-H* from oxides  | 0.30     | 0.01                 | 0.01        |                        |
| (O)H                | 0.32     | 0.00                 | -0.02       | -0.10/-0.60            |

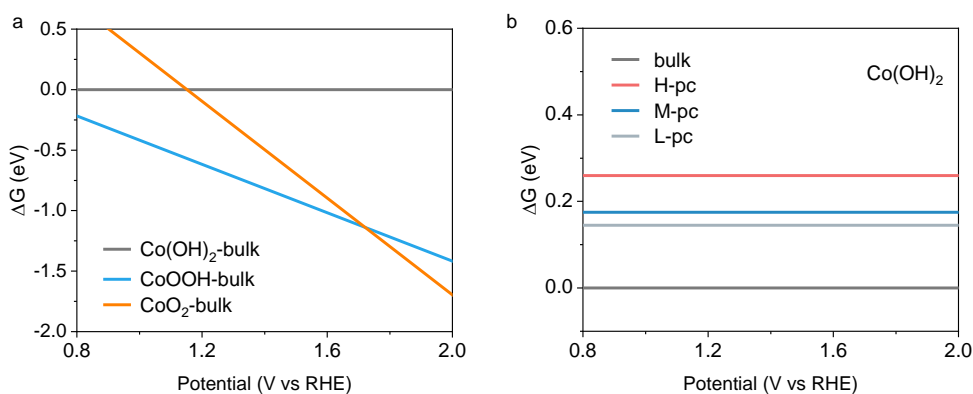

**Supplementary Fig. 17 | The bulk free energy diagrams. (a)** The bulk free energy diagrams of  $\text{Co(OH)}_2$ ,  $\text{CoOOH}$ , and  $\text{CoO}_2$ . **(b)** The bulk free energy diagrams of layered  $\text{Co(OH)}_2$  contain high-, middle-, and low-density of phen that are inserted into interlayers. In the case of  $\text{Co(OH)}_2$ , phen can coordinate with  $\text{Co}^{2+}$ , thus the insertion of phen into  $\text{Co(OH)}_2$  only be considered theoretically.

**Supplementary Table 4 | Formation energy of phen-containing bulk CoOOH and CoO<sub>2</sub> with different numbers of monolayers.**

| Formation energy (eV/Co) | CoOOH+phen | CoO <sub>2</sub> +phen |
|--------------------------|------------|------------------------|
| 1 ML-bulk + phen (H-pc)  | 0.63       | -0.07                  |
| 2 ML-bulk + phen (M-pc)  | 0.40       | -0.03                  |
| 3 ML-bulk + phen (L-pc)  | 0.27       | -0.01                  |

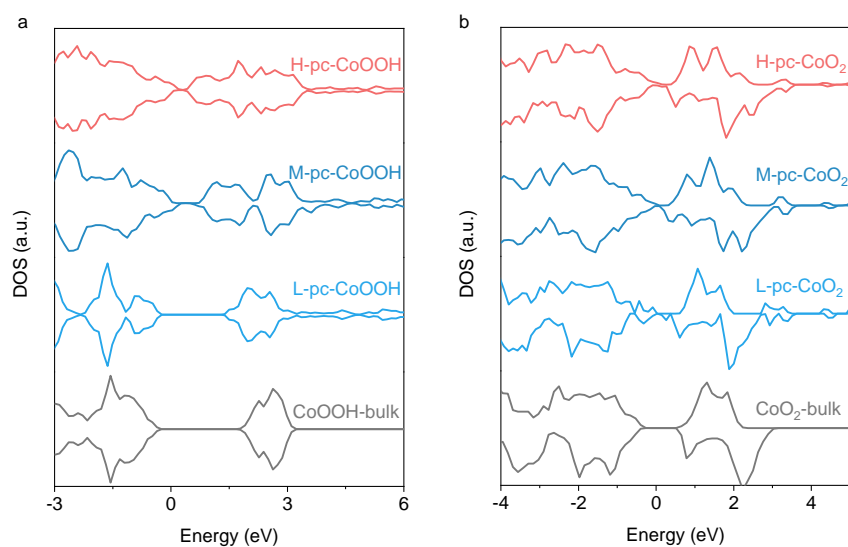

**Supplementary Fig. 18 | The densities of states.** The densities of states (DOS) of phen-free or high-density, middle-density, and low-density phen-containing bulk **(a)** CoOOH and **(b)** CoO<sub>2</sub>.

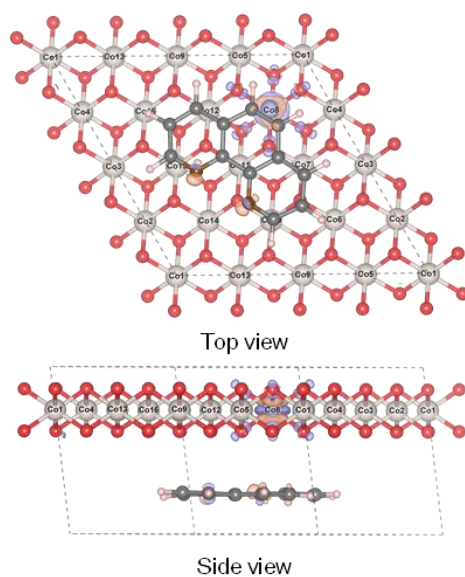

**Supplementary Fig. 19 | Charge density differences of H-pc-CoO<sub>2</sub>.** The purple isosurfaces correspond to charge densities of 0.011 e/Bohr<sup>3</sup> and represent an increase in the total charge density. The orange isosurfaces correspond to charge densities of -0.011 e/Bohr<sup>3</sup> and represent a decrease in the total charge density.

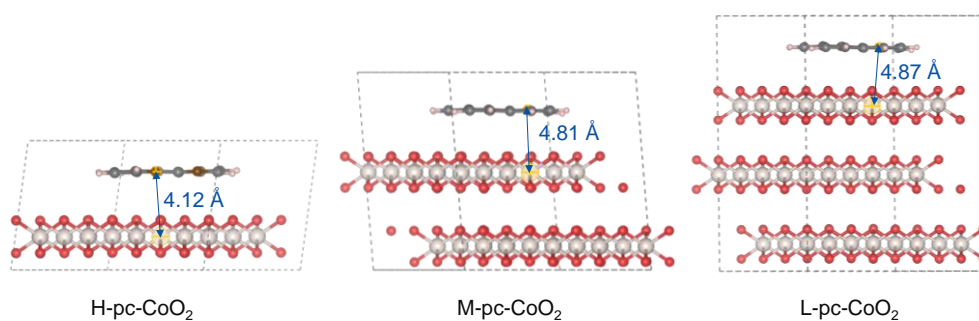

**Supplementary Fig. 20 | The geometric structures of layered CoO<sub>2</sub> containing high(H)-, middle(M)-, and low(L)-density of phen (i.e., 1 ML, 0.5 ML, and 0.33 ML phen) in the interlayers.** The dark blue notes indicate the shortest distance between the N atom and the Co atom.

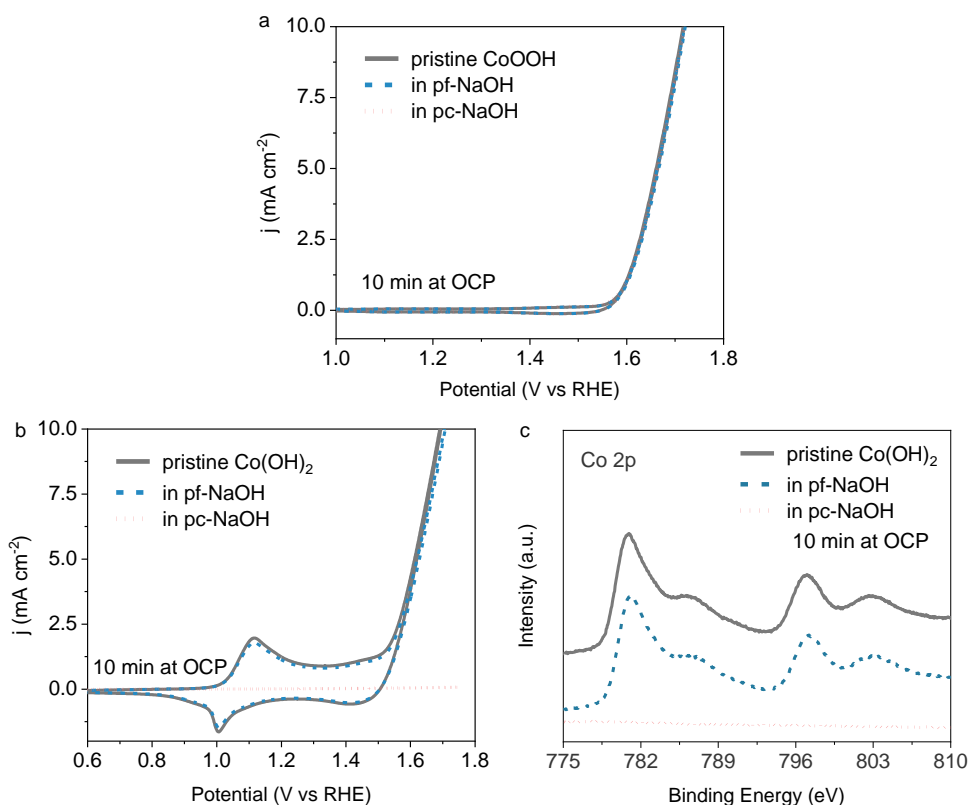

**Supplementary Fig. 21 | The coordination ability of Co<sup>2+</sup> and Co<sup>3+</sup> with phen on electrodes.**

**(a)** The CV curves of the CoOOH catalysts on FTO in 1.0 M NaOH after holding the potential at OCP in phen-free and phen-containing 1.0 M NaOH electrolytes, respectively. **(b)** The CV curves of the Co(OH)<sub>2</sub> catalysts on FTO in 1.0 M NaOH after holding the potential at OCP in phen-free and phen-containing 1.0 M NaOH electrolytes, respectively, and **(c)** the corresponding Co 2p XPS. The concentration of phen is 7 mM.

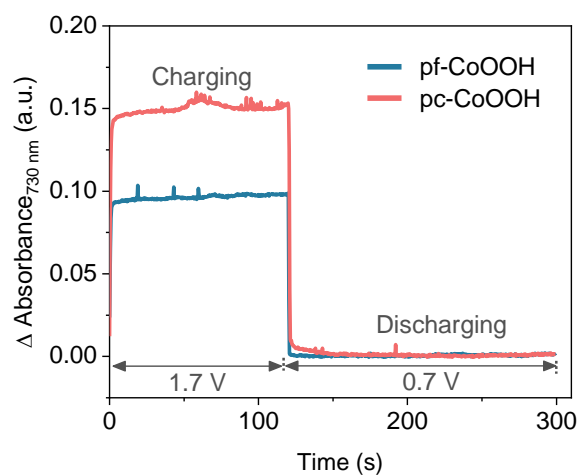

**Supplementary Fig. 22 | In-situ UV-Vis under charging and discharging.** The absorbance difference of pf-CoOOH and pc-CoOOH at 730 nm upon charging at 1.7 V<sub>RHE</sub> and discharging at 0.7 V<sub>RHE</sub> in 1.0 M NaOH. The background was deducted at 0.5 V<sub>RHE</sub>. The absorbance of pf-CoOOH and pc-CoOOH decreases to zero at 0.7 V<sub>RHE</sub>, indicating the different amounts of oxidative charges stored. The pf-CoOOH and pc-CoOOH on FTO were obtained after 10 h chronoamperometry treatments of pristine CoOOH at 1.7 V<sub>RHE</sub> in phen-free and phen-containing 1.0 M NaOH, respectively.



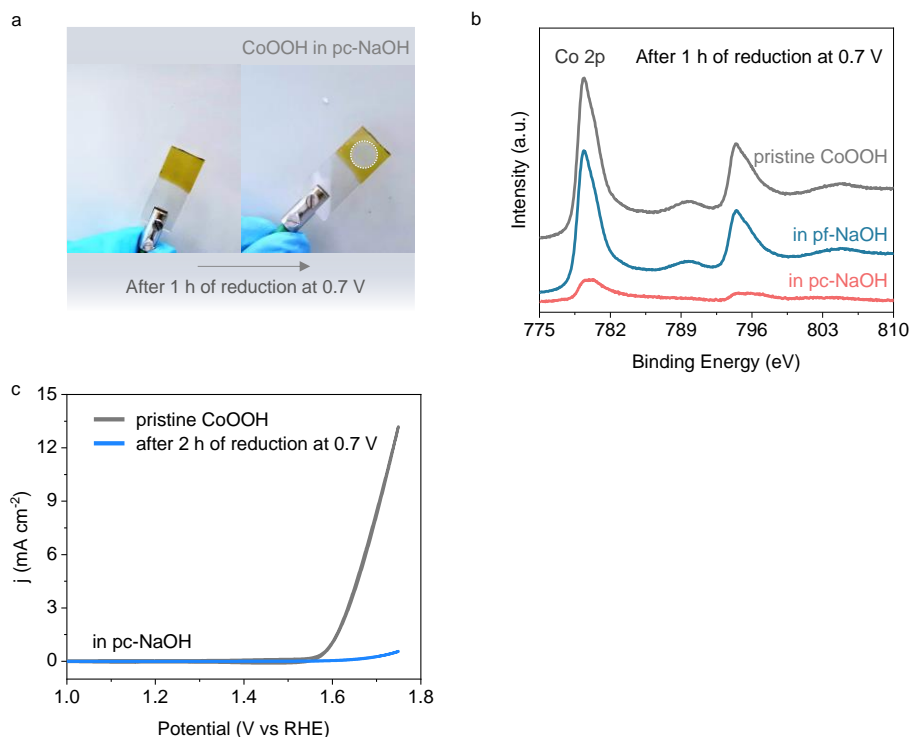

**Supplementary Fig. 23 | The reduction of  $\text{Co}^{3+}$  to  $\text{Co}^{2+}$  leads to the formation of soluble Co-phen species.** (a) The images of pristine CoOOH and CoOOH on FTO after 1.0 h of reduction at 0.7  $V_{\text{RHE}}$  in phen-containing 1.0 M NaOH, (b) and their corresponding Co 2p XPS. (c) The CV curves of CoOOH after 2.0 h of reduction at 0.7 V in phen-containing NaOH. The phen concentration is 7 mM in all cases.

### Supplementary discussion to Supplementary Figs. 20-23

Based on the valence-dependent deposition/dissolution experiments, we can draw the following conclusions:

**(1) Reduction of CoOOH at 0.7  $V_{\text{RHE}}$  leads to the formation of  $\text{Co}^{2+}$  that coordinates with phen to generate soluble Co-phen species in the phen-containing electrolyte.** Discharging the  $\text{Co}^{3+}$  sites and reducing them to  $\text{Co}^{2+}$  after switching the potential from 1.7 to 0.7  $V_{\text{RHE}}$  (that is, close to the offset potential of  $\text{Co}^{3+/2+}$ , as shown in Fig. 2c in the *main text*) in phen-free 1.0 M NaOH electrolyte leads to the reduction of Co sites to the similar level (Supplementary Fig. 22). Holding the potential at 0.7  $V_{\text{RHE}}$  around 2.0 h results in a complete dissolution of the CoOOH catalyst thereby losing OER activity in phen-containing NaOH (Supplementary Fig. 23). To

elucidate the coordination of  $\text{Co}^{2+}$  sites with phen, we synthesized  $\text{Co}^{\text{II}}(\text{OH})_2$  film that coordinated with free phen in electrolytes dissolving into the electrolyte at OCP within only 10 min (Supplementary Figs. 21b-21c). These results demonstrate a valence-dependent deposition/dissolution in the Co-phen system.

**(2) The  $\text{Co}^{3+}$  sites stay on the electrode in the phen-containing electrolyte at OCP.** As shown in Supplementary Fig. 21a, the pristine  $\text{Co}^{\text{III}}\text{OOH}$  stays on the electrode in the phen-containing 1.0 M NaOH electrolyte over 10 min at OCP, and its activity remains relative to the  $\text{Co}^{\text{III}}\text{OOH}$  in the phen-free electrolyte.

**(3) The non-covalent interaction between  $\text{CoO}_2$  and phen.**

(i) The results present that phen can induce and stabilize the high-valence  $\text{Co}^{4+}$  (Fig. 1, Fig. 2, and Supplementary Fig. 1), and improve the charge transfer of the semiconducting  $\text{CoO}_2$  phase. The interplay between phen with  $\text{CoO}_2$  is significantly different from that of phen and  $\text{Co}(\text{OH})_2$  or  $\text{CoOOH}$ . DFT calculations further reveal that phen cannot coordinate with  $\text{Co}^{4+}$  but works through forming a non-covalent interaction.

(ii) The covalent and non-covalent interactions can be distinguished by the stabilization energy and distance in equilibrium. The interactions with low stabilization energies and relatively long distances are ascribed to the “non-covalent interactions”<sup>7</sup>. Typically, covalent interactions are short-range and are generally shorter than 2 Å, and non-covalent interactions are known to act at distances  $>2$  Å<sup>8</sup>. In this work, the shortest distance between the N atom and Co atom is 4.12 Å in H-pc- $\text{CoO}_2$  (Supplementary Fig. 20). Moreover, the calculated interaction energies within the range of 64~113  $\text{kJ mol}_{(\text{phen})}^{-1}$ , depending on low(L)-, middle(M)-, and high(H)-density phen, which are considerably smaller than the stabilization energy of covalent bond of about 200~300  $\text{kJ mol}^{-1}$ . Thus, the interaction between phen with  $\text{CoO}_2$  has been considered non-covalent. This model of H-density phen is close to the phen content in the pc- $\text{CoOOH}$  catalysts.

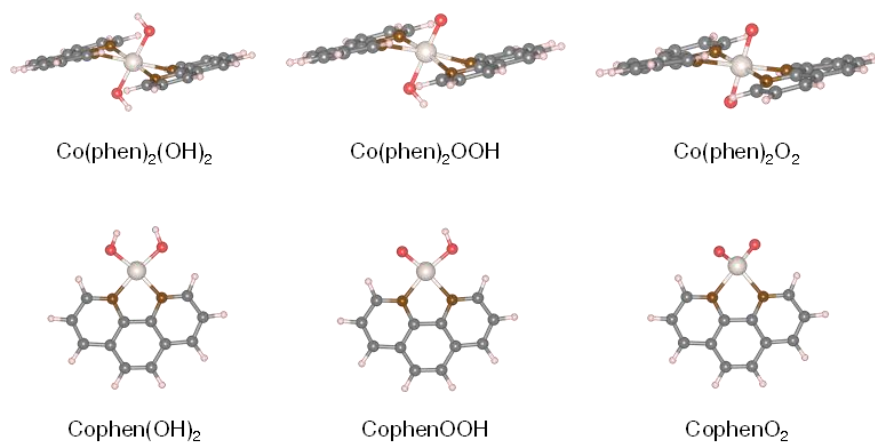

**Supplementary Fig. 24 | The phen-coordinated molecule geometric structures.** The DFT models of Co(phen)<sub>2</sub>(OH)<sub>2</sub>, Co(phen)<sub>2</sub>OOH, Co(phen)<sub>2</sub>O<sub>2</sub>, Cophen(OH)<sub>2</sub>, CophenOOH and CophenO<sub>2</sub>. The energy-unfavorable structures have been discussed in the main text.

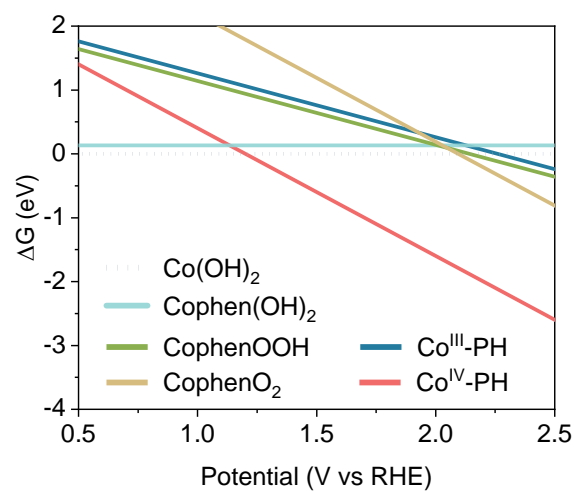

**Supplementary Fig. 25 | The free energy diagrams.** The free energy diagrams of  $\text{Co(OH)}_2$ ,  $\text{Cophen(OH)}_2$ ,  $\text{CophenOOH}$ ,  $\text{CophenO}_2$ , phen-containing layered  $\text{CoOOH}$  ( $\text{Co}^{\text{III}}\text{-PH}$ ), and  $\text{CoO}_2$  ( $\text{Co}^{\text{IV}}\text{-PH}$ ) are based on DFT calculations.

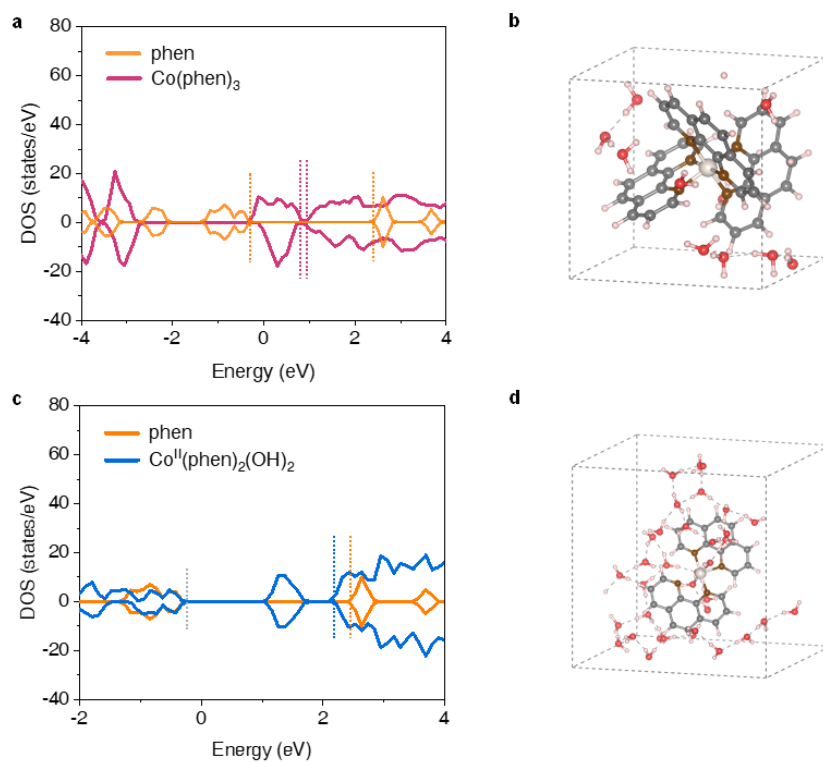

**Supplementary Fig. 26 | The DOS and model of Co(phen)<sub>3</sub> and Co<sup>II</sup>(phen)<sub>2</sub>(OH)<sub>2</sub>.** (a) The DOS and PDOS of Co(phen)<sub>3</sub> and phen. (b) The DFT model of Co(phen)<sub>3</sub> in water. (c) The DOS and PDOS of phen and Co<sup>II</sup>(phen)<sub>2</sub>(OH)<sub>2</sub>. (d) The DFT model for Co<sup>II</sup>(phen)<sub>2</sub>(OH)<sub>2</sub> in water.

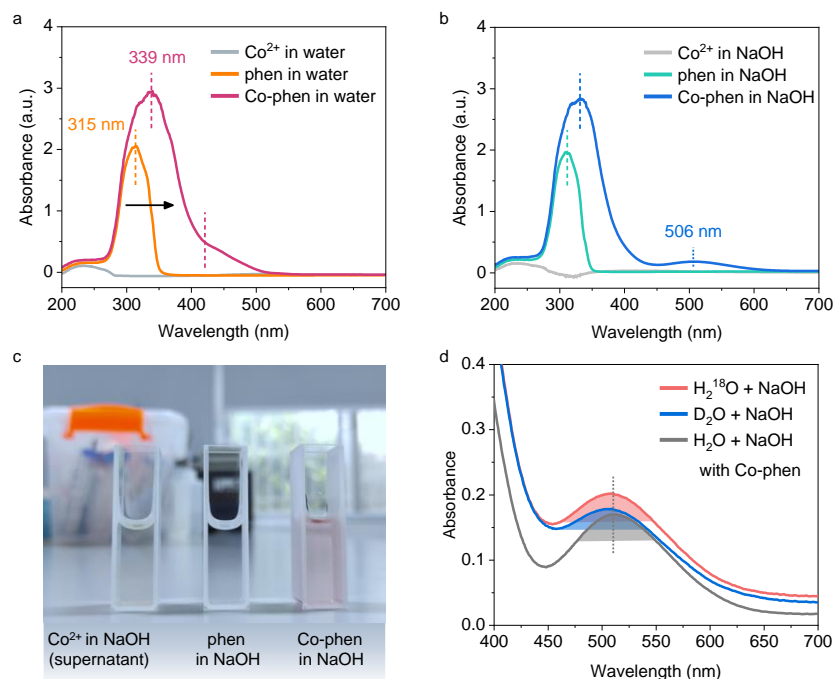

**Supplementary Fig. 27 | The UV-Vis spectra.** (a) The UV-Vis spectra of  $\text{Co}^{2+}$ , phen, and Co-phen in water and (b) 1.0 M NaOH, respectively. The absorption peak shows a slightly red-shift from 315 nm for phen to a higher wavelength at 339 nm for Co-phen in water, suggesting the coordination of  $\text{Co}^{2+}$  and phen. In addition, a new absorption band appears at approximately 450 nm, which is assigned to the ligand-to-metal charge transfer. In 1.0 M NaOH, this ligand-to-metal absorption peak redshifts to ~506 nm. (c) The photographs of  $\text{Co}^{2+}$ , phen, and Co-phen in 1.0 M NaOH. (d) The UV-Vis spectra of Co-phen in  $\text{H}_2^{18}\text{O}$ ,  $\text{D}_2^{16}\text{O}$ , and  $\text{H}_2^{16}\text{O}$  with 1.0 M  $\text{Na}^{16}\text{OH}$ , respectively. The peak at ~506 nm shows a slight shift due to the isotope effect<sup>9-11</sup>, indicating the water-associated coordination. The background is deducted by the bare quartz cuvettes.

### Supplementary discussion to Supplementary Figs. 26-27

DFT calculations of DOS for the  $\text{Co}(\text{phen})_3$  and  $\text{Co}(\text{phen})_2(\text{OH})_2$  were carried out. Coordination between Co and phen yielded a narrow energy gap (Supplementary Fig. 26a). Thus, the absorption peak at 450 nm in Supplementary Fig. 27a could be ascribed to the Co-N coordination. While,  $\text{Co}(\text{phen})_2(\text{OH})_2$  shows an obvious decrease in energy gap (Supplementary Fig. 26b), consistent with the redshift of the absorption peak of Co-N coordination (Supplementary Fig. 27b).

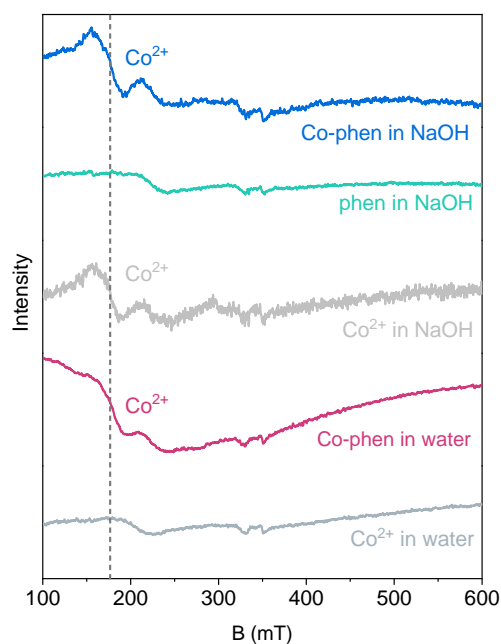

**Supplementary Fig. 28 | The EPR spectra at 100 K.** The EPR spectra of Co<sup>2+</sup>, phen, and Co-phen in water and 1.0 M NaOH. The Co<sup>2+</sup> in water is almost EPR silent. However, a broad paramagnetic signal<sup>12,13</sup> ( $g \approx 4.31$ ) appeared when phen was introduced, suggesting the coordination between phen and Co<sup>2+</sup> induced a spin-state transition of Co<sup>2+</sup>. In contrast to the situation in the water, a broad paramagnetic Co<sup>2+</sup> signal was observed in NaOH electrolytes.

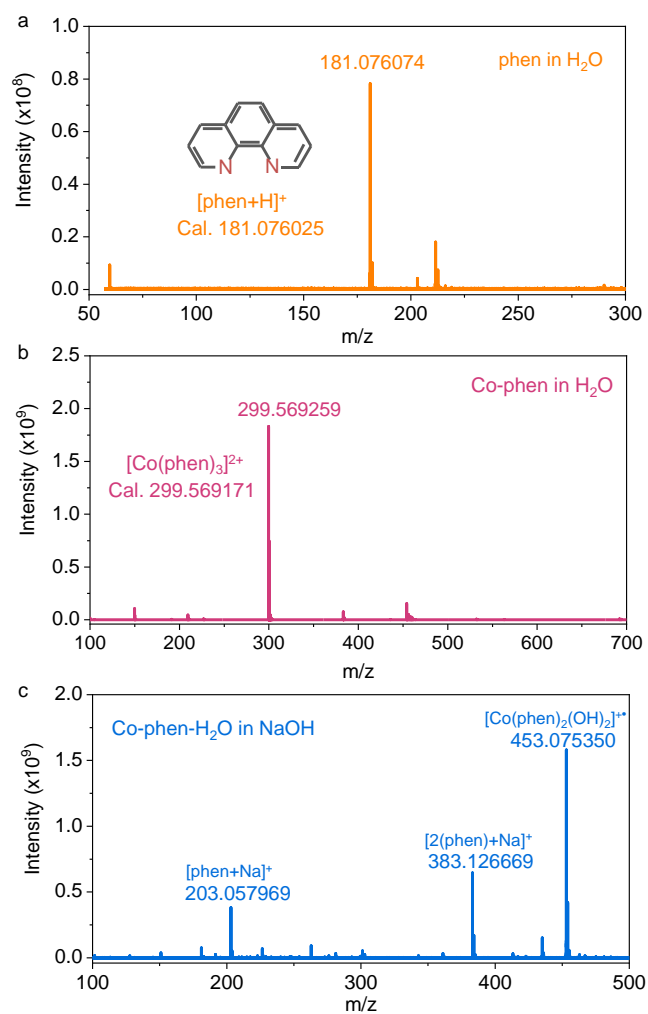

**Supplementary Fig. 29 | The FT-ICR-MS spectra.** (a) FT-ICR-MS spectra for phen in water, (b) Co-phen in water, and (c) Co-phen in 1.0 M NaOH. The spectra were recorded using dual electrospray ionization (ESI) source in the positive ion mode.



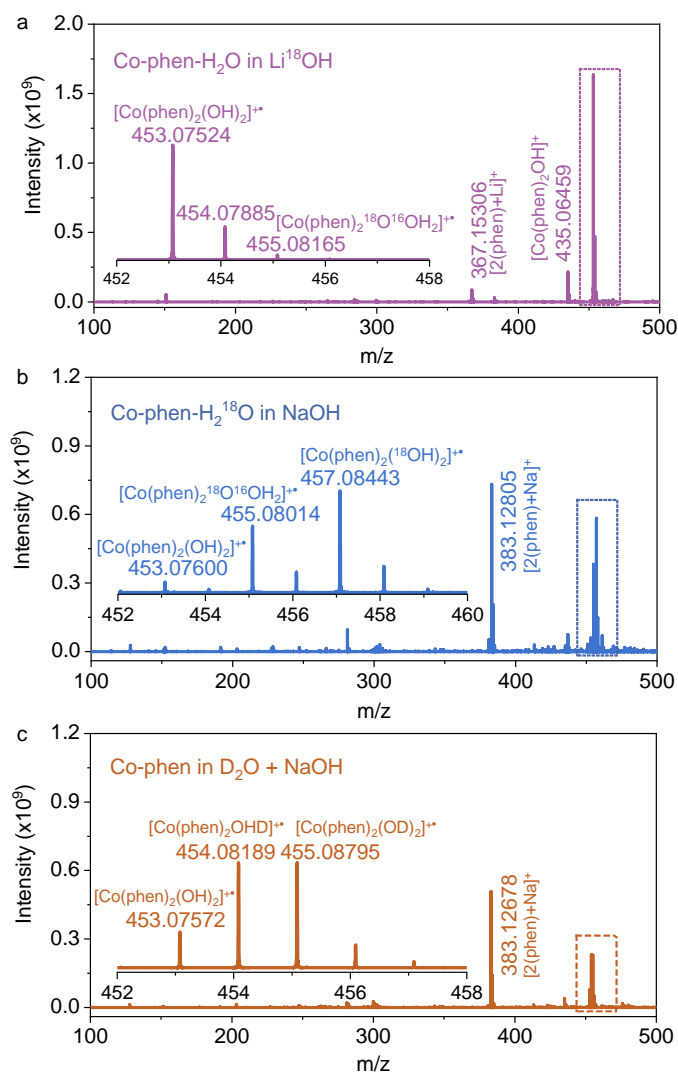

**Supplementary Fig. 30 | Isotope-labeled FT-ICR-MS spectra.** (a) FT-ICR-MS spectra for Co-phen in H<sub>2</sub><sup>16</sup>O with 1 M Li<sup>18</sup>OH, (b) Co-phen in H<sub>2</sub><sup>18</sup>O (97.4%) with 1.0 M Na<sup>16</sup>OH, and (c) Co-phen in D<sub>2</sub>O (99.9%) with 1.0 M NaOH. The spectra were recorded using dual electrospray ionization (ESI) source in the positive ion mode.

**Supplementary Table 5 | The molecular formula of isotope-labeled Co-phen in H<sub>2</sub>O with 1.0 M NaOH or Li<sup>18</sup>OH.**

|                                                                                | <b>Molecular formula</b>                                                              | <b>Experimental</b> | <b>Theoretical</b> |
|--------------------------------------------------------------------------------|---------------------------------------------------------------------------------------|---------------------|--------------------|
| <b>Co-phen in H<sub>2</sub><sup>18</sup>O<br/>with 1.0 M Na<sup>16</sup>OH</b> | [2phen+Na] <sup>+</sup>                                                               | 383.12805           | 383.126169         |
|                                                                                | [Co(phen) <sub>2</sub> ( <sup>18</sup> OH) <sub>2</sub> ] <sup>++</sup>               | 457.084427          | 457.084115         |
|                                                                                | [Co(phen) <sub>2</sub> <sup>18</sup> O <sup>16</sup> OH) <sub>2</sub> ] <sup>++</sup> | 455.080137          | 455.079869         |
|                                                                                | [Co(phen) <sub>2</sub> ( <sup>16</sup> OH) <sub>2</sub> ] <sup>++</sup>               | 453.076001          | 453.075622         |
|                                                                                | <b>Molecular formula</b>                                                              | <b>Experimental</b> | <b>Theoretical</b> |
| <b>Co-phen in H<sub>2</sub><sup>16</sup>O<br/>with 1.0 M Li<sup>18</sup>OH</b> | [2phen+Li] <sup>+</sup>                                                               | 367.15306           | 367.0774           |
|                                                                                | [Co(phen) <sub>2</sub> ( <sup>16</sup> OH) <sub>2</sub> ] <sup>++</sup>               | 453.07524           | 453.075622         |
|                                                                                | [Co(phen) <sub>2</sub> <sup>18</sup> O <sup>16</sup> OH) <sub>2</sub> ] <sup>++</sup> | 455.081651          | 455.079869         |

#### **Supplementary discussion to Supplementary Figs. 29-30 and Supplementary Table 5**

We applied Fourier-transform ion cyclotron resonance mass spectrometry (FT-ICR-MS) to verify the molecular formula. The formula of Co-phen in water (Supplementary Fig. 29b) and 1.0 M NaOH (Supplementary Fig. 29c) by FT-ICR-MS are deduced to be dominated by [Co(phen)<sub>3</sub>]<sup>2+</sup> species with an  $m/z$  ratio of 299.569 and [Co(phen)<sub>2</sub>(OH)<sub>2</sub>]<sup>++</sup> with an  $m/z$  ratio of 453.075, respectively. Furthermore, isotope-labeled H<sub>2</sub><sup>18</sup>O, D<sub>2</sub>O, and Li<sup>18</sup>OH are used to verify the source of OH of [Co(phen)<sub>2</sub>(OH)<sub>2</sub>]<sup>++</sup>. As shown in Supplementary Figs. 30a-30b and Supplementary Table 5, the strongest peak at  $m/z$  457.084 is ascribed to the [Co(phen)<sub>2</sub>(<sup>18</sup>OH)<sub>2</sub>]<sup>++</sup> in 1.0 M Na<sup>16</sup>OH-containing H<sub>2</sub><sup>18</sup>O electrolyte. In contrast, the strongest peak at  $m/z$  453.075 is assigned to [Co(phen)<sub>2</sub>(<sup>16</sup>OH)<sub>2</sub>]<sup>++</sup> in 1.0 M Li<sup>18</sup>OH containing H<sub>2</sub>O electrolyte. Further, the peak at  $m/z$  455.088 is assigned to [Co(phen)<sub>2</sub>(OD)<sub>2</sub>]<sup>++</sup> in 1.0 M NaOH D<sub>2</sub>O electrolyte (Supplementary Fig. 30c). The results suggest that the OH<sup>-</sup> in [Co(phen)<sub>2</sub>(OH)<sub>2</sub>]<sup>++</sup> is from H<sub>2</sub>O.

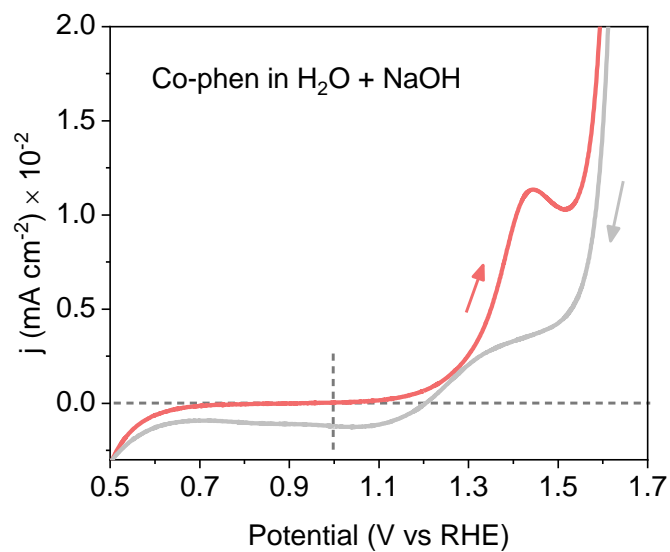

**Supplementary Fig. 31 | The first CV of bare FTO in Co(phen)<sub>2</sub>(OH)<sub>2</sub>-containing 1.0 M NaOH.** The red curve shows the oxidation process of Co<sup>2+</sup>, and the grey one shows the reduction process of Co<sup>3+</sup>/Co<sup>4+</sup> to Co<sup>2+</sup>.

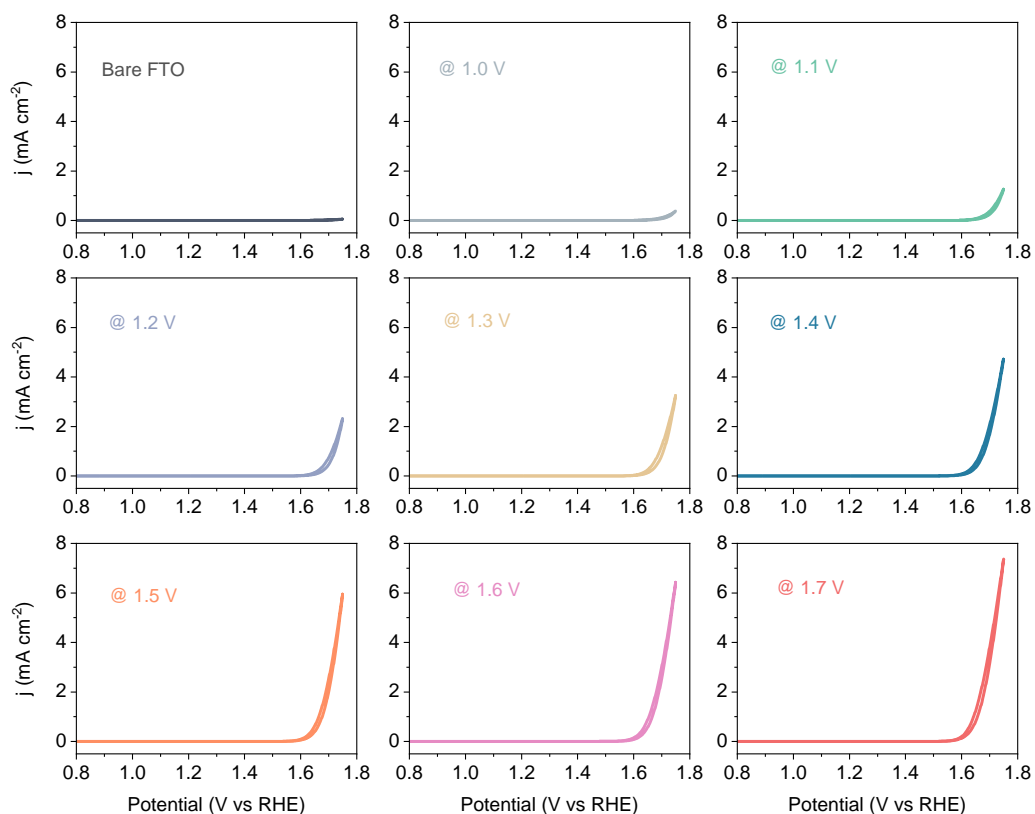

**Supplementary Fig. 32 | The CV curves of Co-PH catalysts prepared by 10 min deposition at different potentials.** Co-PH catalysts were deposited in  $\text{Co(phen)}_2(\text{OH})_2$ -containing 1.0 M NaOH, and after the deposition, the CV curves of Co-PH catalysts were recorded in phen-free 1.0 M NaOH. Note that the bare FTO has no electrochemical response in the current potential range.

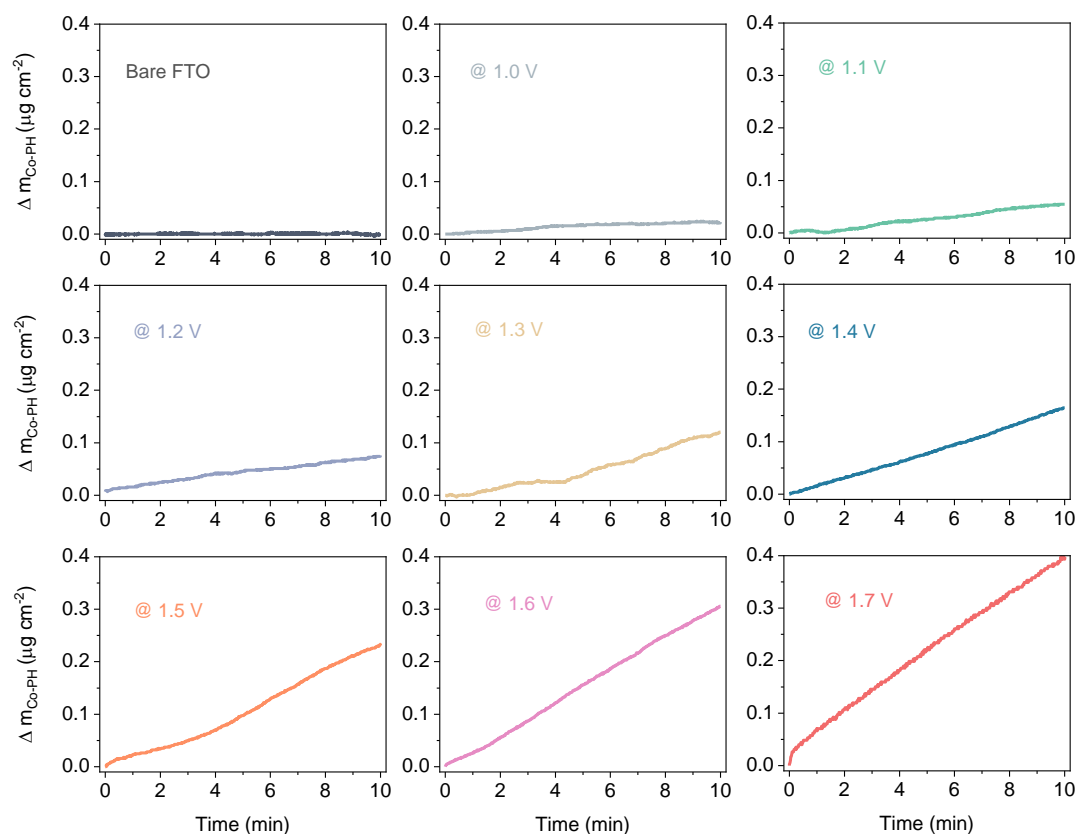

**Supplementary Fig. 33 | The mass evolution with time during the Co-PH deposition at different potentials.** It is monitored by electrochemical quartz crystal microbalance (EQCM). The Co-PH catalysts were deposited for 10 min in  $\text{Co(phen)}_2(\text{OH})_2$ -containing 1.0 M NaOH from 1.0 V to 1.7  $V_{\text{RHE}}$ , respectively. Note that no detectable mass changes are observed under OCP.

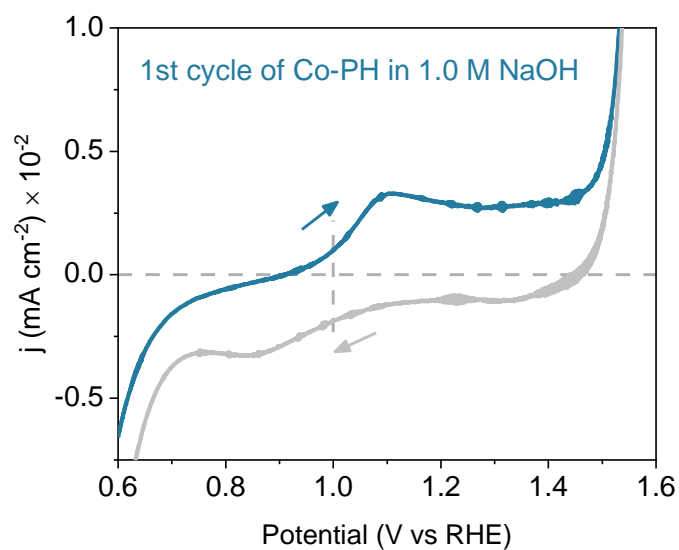

**Supplementary Fig. 34 | The first CV of Co-PH in 1.0 M NaOH.** The Co-PH was prepared by 10 min deposition on FTO at 1.7 V<sub>RHE</sub> in Co(phen)<sub>2</sub>(OH)<sub>2</sub>-containing 1.0 M NaOH. The blue curve shows the oxidation process of Co<sup>2+</sup> to Co<sup>3+</sup>/Co<sup>4+</sup>, and the grey one shows the reduction process of Co<sup>3+</sup>/Co<sup>4+</sup> to Co<sup>2+</sup>.

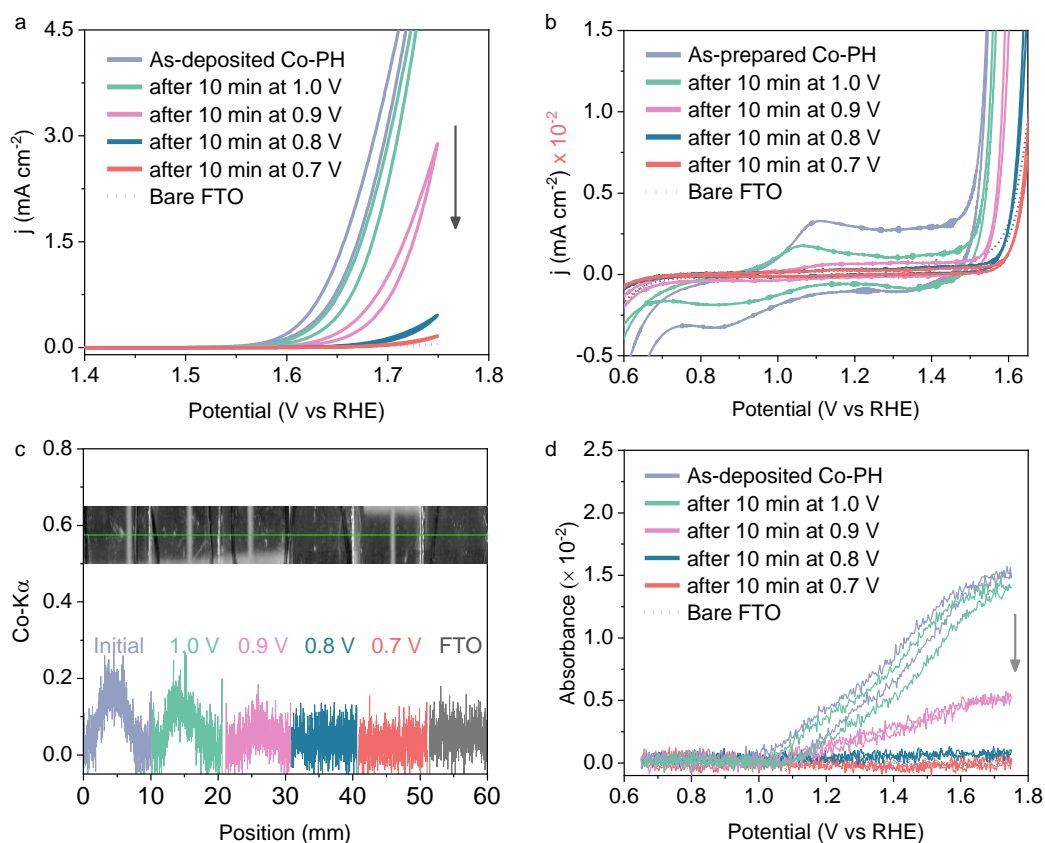

**Supplementary Fig. 35 | The valence-dependent dissolution of Co-PH.** (a) The CVs of Co-PH in 1.0 M NaOH after 10 min of dissolution at different potentials in Co(phen)<sub>2</sub>(OH)<sub>2</sub>-containing 1.0 M NaOH. (b) The corresponding redox couples. (c) The linear mapping of Co distribution of Co-PH electrodes by monitoring the Co-K $\alpha$  emission with XRF. (d) The in-situ UV-Vis spectra of Co-PH in 1.0 M NaOH after 10 min reduction in Co(phen)<sub>2</sub>(OH)<sub>2</sub>-containing 1.0 M NaOH at different potentials.

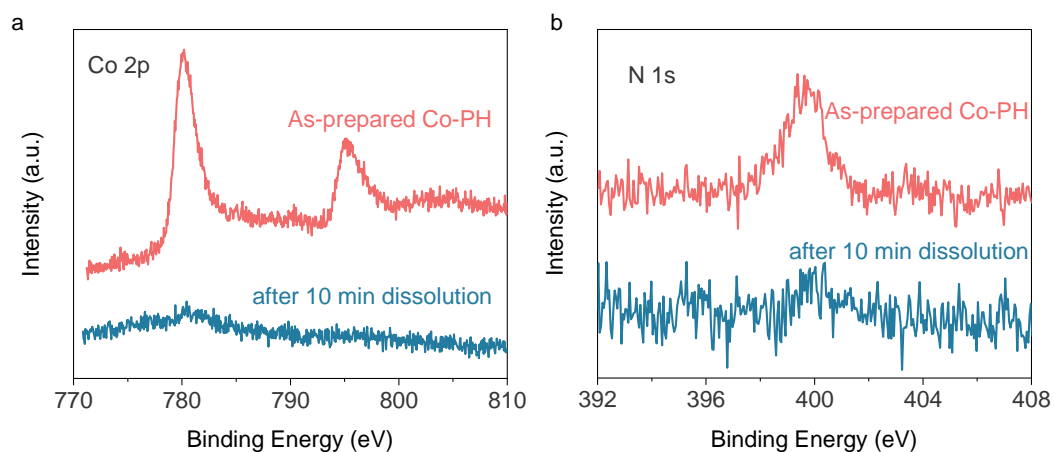

**Supplementary Fig. 36 | Monitoring the valence-dependent deposition/dissolution process of Co-PH by XPS. (a)** The Co 2*p*, and **(b)** N 1*s* XPS of as-prepared Co-PH by 10 min deposition at 1.7 V<sub>RHE</sub> and after subsequent 10 min reduction at 0.7 V<sub>RHE</sub> in Co(phen)<sub>2</sub>(OH)<sub>2</sub>-containing 1.0 M NaOH.



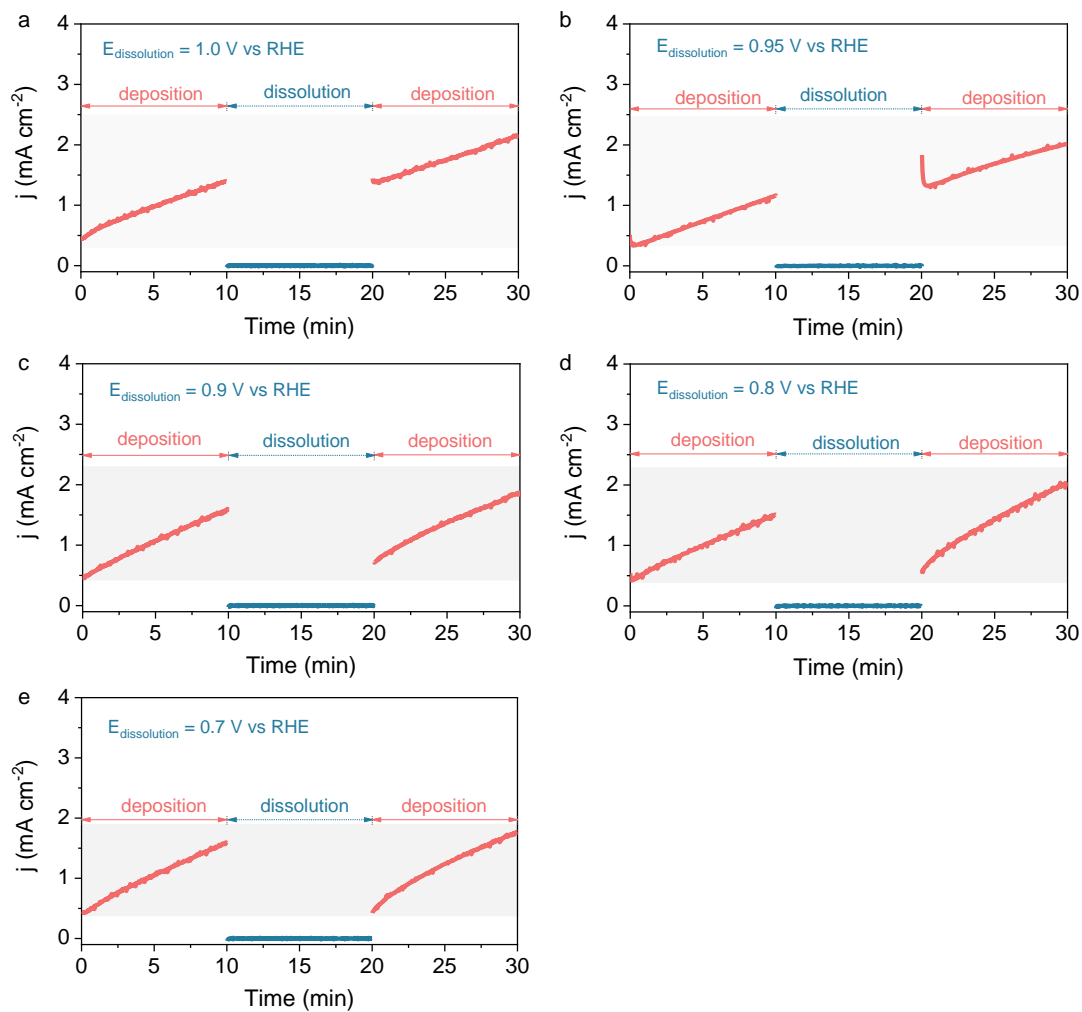

**Supplementary Fig. 37 | The valence-dependent deposition/dissolution process of Co-PH.**

The applied deposition potential (red curves) is  $1.7 \text{ V}_{\text{RHE}}$  and the reduction potentials (blue curves) were set at (a)  $1.0 \text{ V}_{\text{RHE}}$ , (b)  $0.95 \text{ V}_{\text{RHE}}$ , (c)  $0.9 \text{ V}_{\text{RHE}}$ , (d)  $0.8 \text{ V}_{\text{RHE}}$  and (e)  $0.7 \text{ V}_{\text{RHE}}$ , respectively. The deposition/dissolution process was implemented in  $\text{Co(phen)}_2(\text{OH})_2$ -containing  $1.0 \text{ M NaOH}$ .

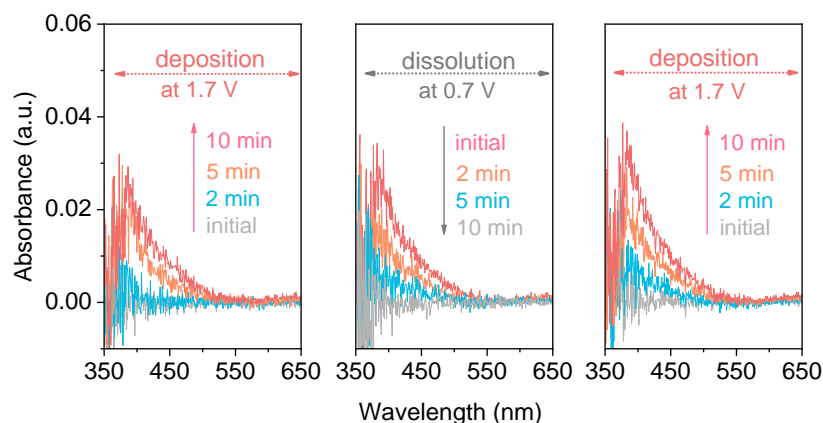

**Supplementary Fig. 38 | In-situ UV-Vis tracks the deposition/dissolution process of Co-PH catalysts.** The deposition/dissolution process was tracked in  $\text{Co(phen)}_2(\text{OH})_2$ -containing 1.0 M NaOH.

### Supplementary discussion to Supplementary Figs. 31-38

#### Valence-dependent interactions between Co and phen

**(1) Valence-dependent deposition.** In-situ deposition of phen-containing  $\text{CoO}_x\text{H}_y$  (Co-PH) with abundant  $\text{Co}^{4+}$  in 1.0 M NaOH containing  $\text{Co(phen)}_2(\text{OH})_2$  complex during the OER was carried out. Different deposition potentials were applied from 1.0 (that is, close to the onset potential of  $\text{Co}^{2+/3+}$  in Supplementary Fig. 31) to 1.7  $V_{\text{RHE}}$  for 10 min. From the CV curves in Supplementary Fig. 32, we can find a potential-regulated activity relationship. In addition, the mass loadings of Co-PH catalysts in-situ measured by EQCM evidenced a valence-dependent deposition process (Supplementary Fig. 33). Hence, the deposition of Co-PH will take place under applied potential once the  $\text{Co}^{2+}$  is oxidized to  $\text{Co}^{3+}$  that can be further easily oxidized to  $\text{Co}^{4+}$  with the aid of phen.

**(2) Valence-dependent coordination and dissolution.** A stepwise decrease in reduction potential from 1.0 to 0.7  $V_{\text{RHE}}$  (considering the reduction peak of  $\text{Co}^{3+/2+}$  centered approximately at 0.9  $V_{\text{RHE}}$  in Supplementary Fig. 34) leads to different degrees of reduction to  $\text{Co}^{2+}$ . As expected, attenuation trends in the redox couple are observed. Complete dissolution of Co-PH is observed at 0.7  $V_{\text{RHE}}$  (Supplementary Figs. 35-36). Co K $\alpha$  via X-Ray fluorescence (XRF) line scan and in-situ UV-Vis support the conclusion. Interestingly, multiple deposition-dissolution cycles at an alternating potential between 1.7 and 0.7  $V_{\text{RHE}}$  in 1.0 M NaOH electrolyte containing  $\text{Co(phen)}_2(\text{OH})_2$  demonstrate a quite reversible/regenerable manner (Supplementary Figs. 37-38).

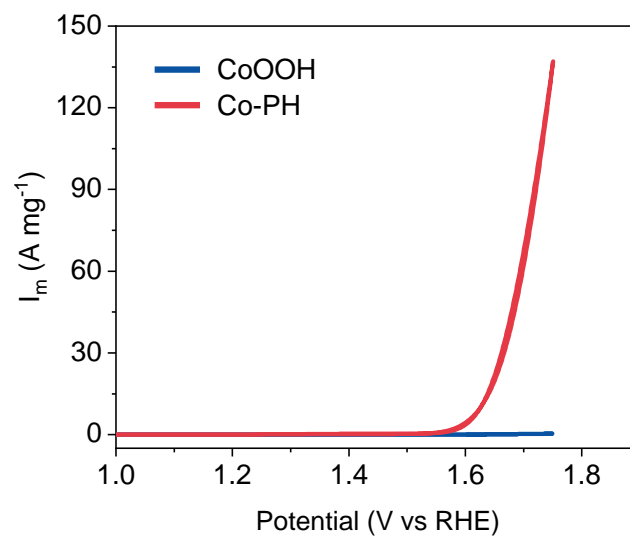

**Supplementary Fig. 39 | The mass activity of CoOOH and Co-PH before  $iR$  correction.** Co-PH was freshly deposited for 10 min at 1.7 V<sub>RHE</sub> in Co(phen)<sub>2</sub>(OH)<sub>2</sub>-containing 1.0 M NaOH. The mass of Co was determined by ICP-MS.

**Supplementary Table 6 | The OER TOFs of reported Co-based layered double hydroxides and (oxy) hydroxides at an overpotential of 0.35 V.**

| Catalyst            | TOF <sub>Co</sub> (s <sup>-1</sup> ) | Ref |
|---------------------|--------------------------------------|-----|
| CoFe LDH            | ~0.00505                             | 14  |
| CoCo LDH            | ~0.00265                             | 14  |
| NiCo LDH            | ~0.00281                             | 14  |
| CoMn LDH            | ~0.00110                             | 14  |
| Co(OH) <sub>2</sub> | ~0.00052                             | 14  |
| CoOOH               | 0.007±0.001                          | 15  |

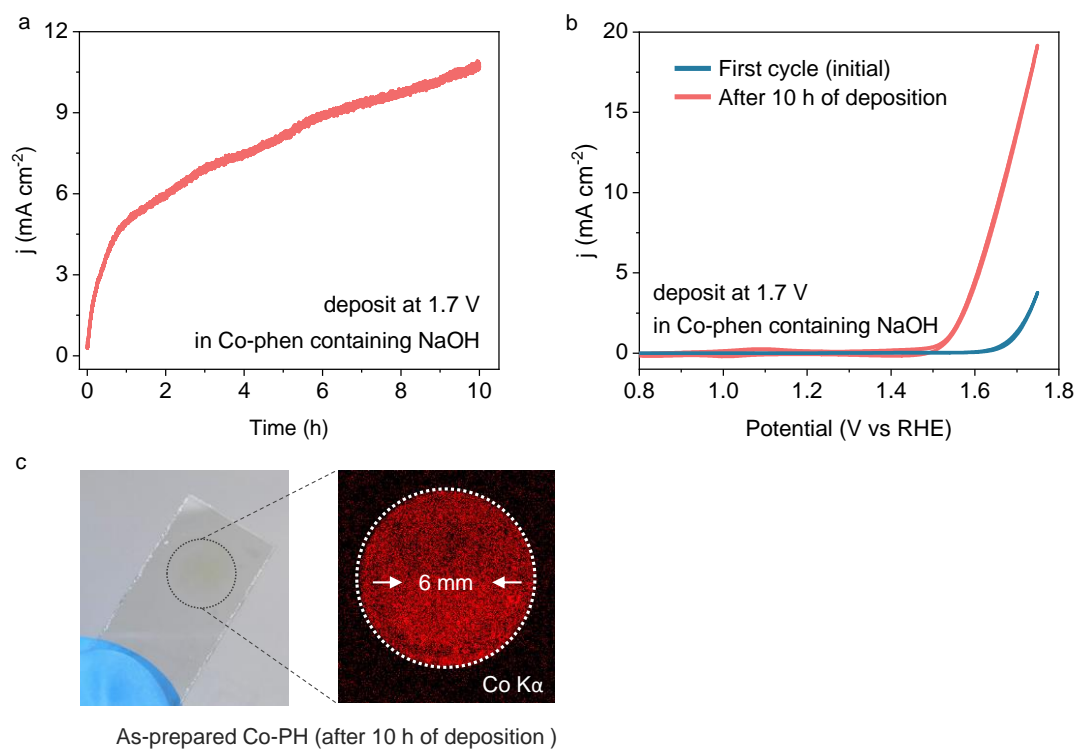

**Supplementary Fig. 40 | The deposition of Co-PH.** (a) The chronoamperometry curves during the in-situ deposition process of Co-PH on FTO at 1.7 V<sub>RHE</sub> for 10 h in Co(phen)<sub>2</sub>(OH)<sub>2</sub>-containing 1.0 M NaOH. (b) The corresponding CV curves (the first cycle already shows some activity due to the fast deposition of Co-PH). (c) The corresponding photographs and XRF mapped Co distribution.

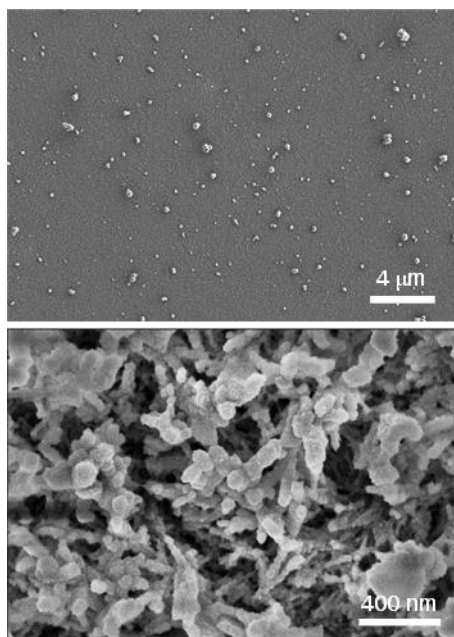

**Supplementary Fig. 41 | The surface morphology of Co-PH after 10 h deposition.** Co-PH was deposited on FTO at 1.7 V<sub>RHE</sub> in Co(phen)<sub>2</sub>(OH)<sub>2</sub>-containing 1.0 M NaOH for 10 h.

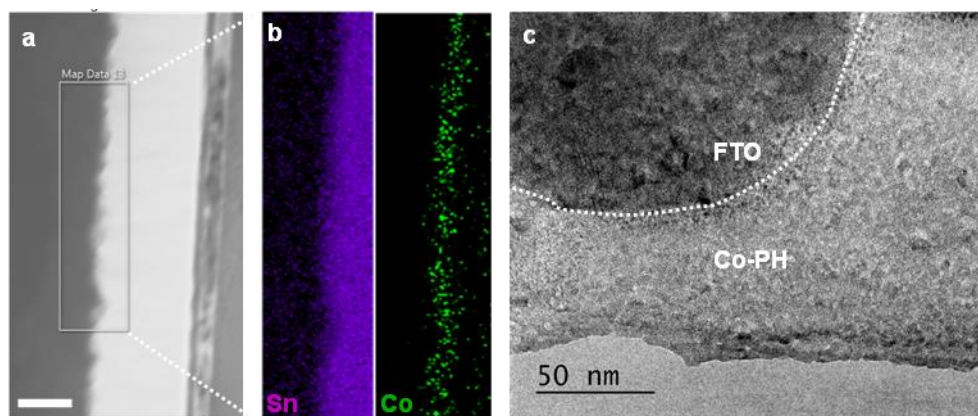

**Supplementary Fig. 42 | The cross-section STEM images of Co-PH after 10 h deposition. (a)** The cross-section image of Co-PH on the FTO scale bar: 200 nm. **(b)** The corresponding element mapping. **(c)** The cross-section image. The Co-PH was deposited at 1.7 V<sub>RHE</sub> in Co(phen)<sub>2</sub>(OH)<sub>2</sub>-containing 1.0 M NaOH for 10 h.

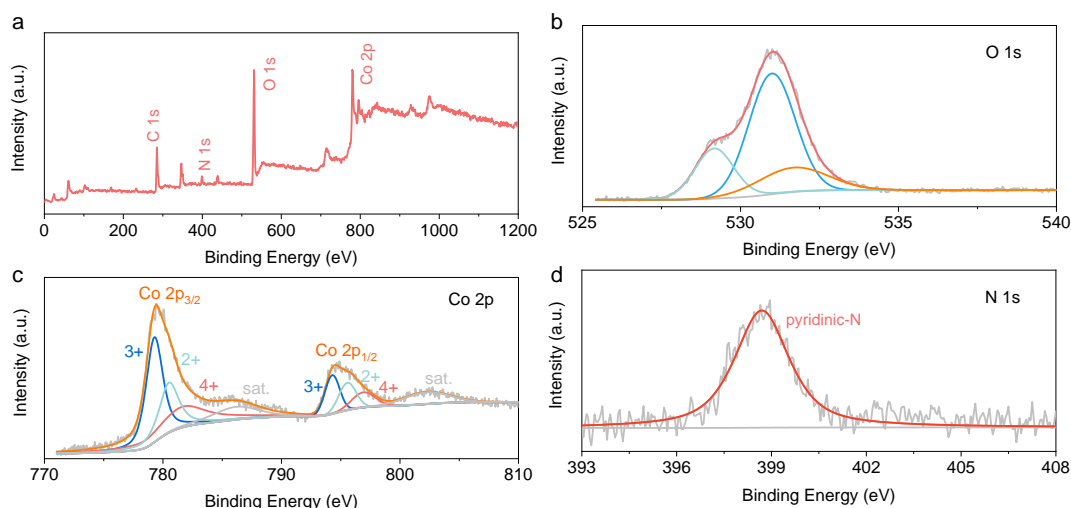

**Supplementary Fig. 43 | The XPS of Co-PH after 10 h deposition.** (a) The XPS survey, (b) O 1s, (c) Co 2p, and (d) N 1s spectra of Co-PH after 10 h deposition at 1.7 V<sub>RHE</sub> in Co(phen)<sub>2</sub>(OH)<sub>2</sub>-containing 1.0 M NaOH. The fitted peaks at 529.2 eV and 531.0 eV are assigned to OH<sup>-</sup> and O<sup>2-</sup>, respectively. The peak at 531.7 eV is associated with Co-O-H<sup>16</sup>. The fitted peaks at 780.5 and 795.6 eV<sup>17-19</sup> are attributed to the Co<sup>4+</sup>. The peaks at 779.3 and 794.3 eV, and peaks at 781.7 and 796.9 eV are attributed to the Co<sup>3+</sup> and Co<sup>2+</sup>, respectively<sup>20</sup>. The fitted peak at 398.6 eV is generally deemed as a pyridinic-N bond<sup>21</sup>.

**Supplementary Table 7 | The composition of Co-PH after 10 min and 10 h deposition at 1.7 V<sub>RHE</sub> in Co(phen)<sub>2</sub>(OH)<sub>2</sub>-containing 1.0 M NaOH.**

|        | Co 2p | N 1s  | Co/N |
|--------|-------|-------|------|
| 10 min | 66.2% | 33.8% | 1.96 |
| 10 h   | 67.5% | 32.5% | 2.08 |



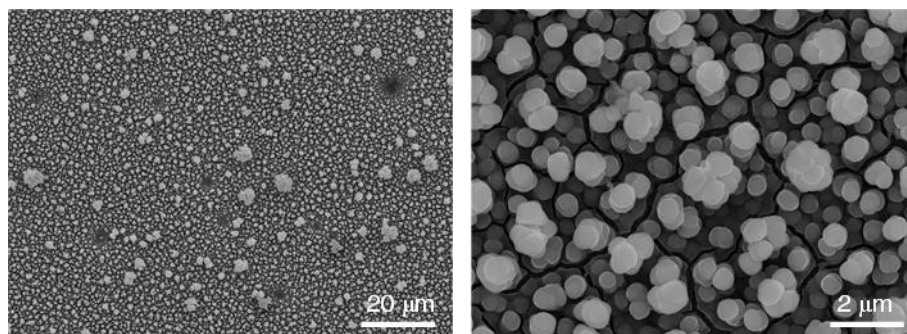

**Supplementary Fig. 44 | The surface morphology of Co-PH after 40 h deposition.** The Co-PH was deposited on FTO in  $\text{Co(phen)}_2(\text{OH})_2$ -containing 1.0 M NaOH at 1.7  $V_{\text{RHE}}$  for 40 h.

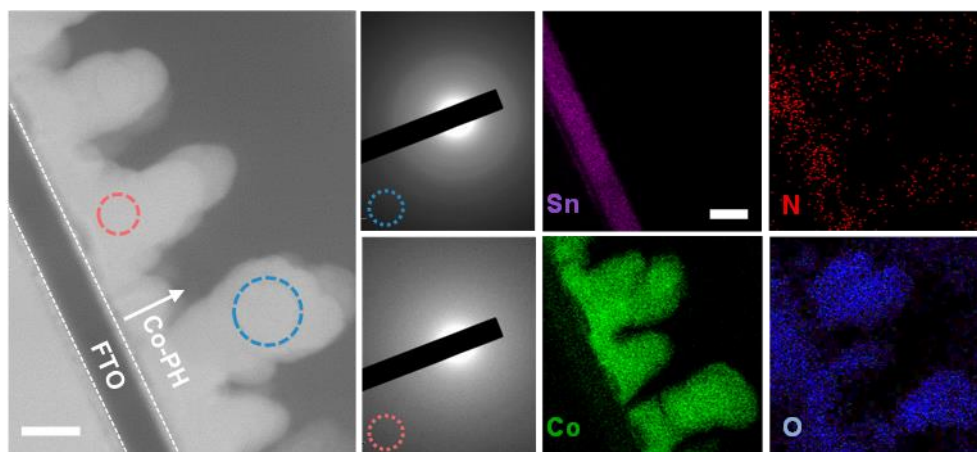

**Supplementary Fig. 45 | The cross-section STEM images of Co-PH on FTO after 40 h deposition.** The cross-section images, SAED, and corresponding cross-section element mapping of Co-PH film. The Co-PH was deposited in  $\text{Co(phen)}_2(\text{OH})_2$ -containing 1.0 M NaOH at 1.7  $V_{\text{RHE}}$  for 40 h. Scale bar: 500 nm.

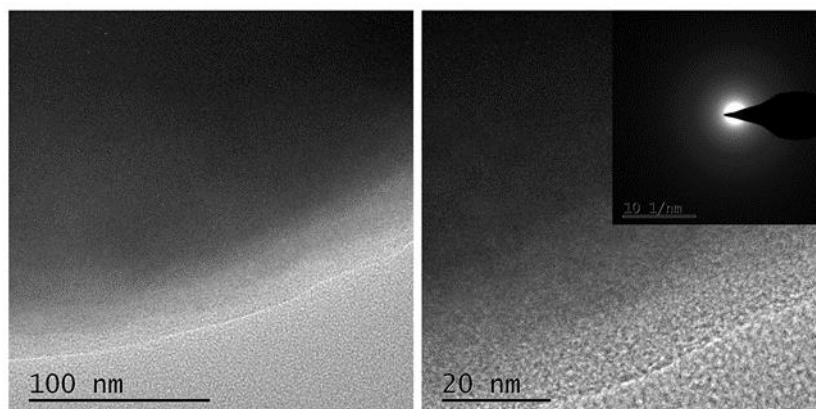

**Supplementary Fig. 46 | HRTEM.** The HRTEM and electron diffraction (inset) of the Co-PH after 500 h deposition in  $\text{Co(phen)}_2(\text{OH})_2$ -containing 1.0 M NaOH at  $10 \text{ mA cm}^{-2}$ .

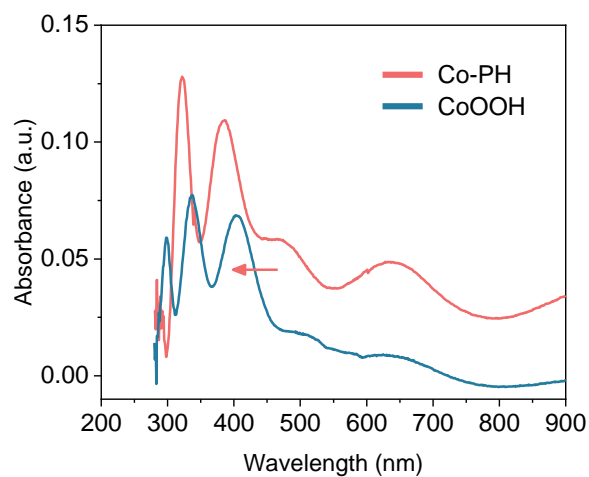

**Supplementary Fig. 47 | The UV-Vis spectra.** The UV-Vis spectra of CoOOH and Co-PH films on FTO. The absorbance was subtracted by bare FTO. The clear blue shift of absorption bands of Co-PH relative to CoOOH suggests the variation of Co valence states and coordination environments. The Co-PH was deposited in  $\text{Co(phen)}_2(\text{OH})_2$ -containing 1.0 M NaOH at 1.7  $V_{\text{RHE}}$  for 10 h.

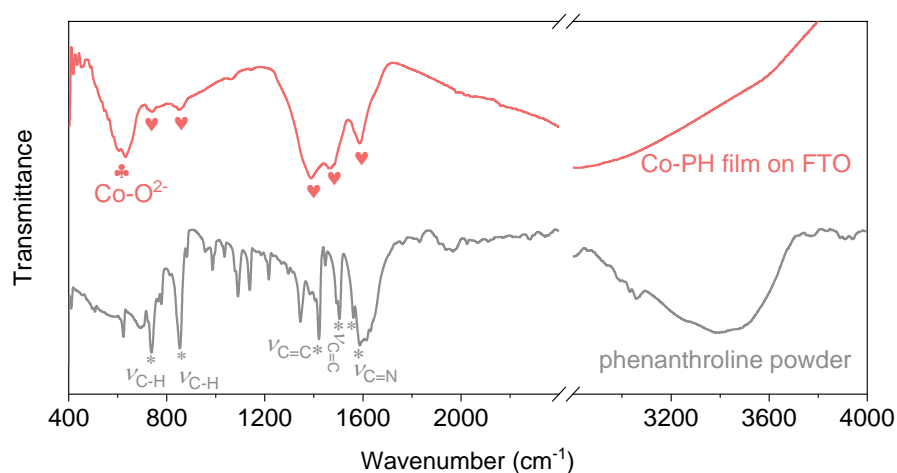

**Supplementary Fig. 48 | The ATR-FTIR spectra of Co-PH.** The ATR-FTIR of phenanthroline and Co-PH film on FTO. The Co-PH was deposited in  $\text{Co(phen)}_2(\text{OH})_2$ -containing 1.0 M NaOH at 1.7  $V_{\text{RHE}}$  for 10 h. The bands at  $737\text{ cm}^{-1}$  and  $852\text{ cm}^{-1}$  are ascribed to the out-of-plane bending of C-H on benzene and heterocyclic rings, respectively. The peaks at  $1421\text{ cm}^{-1}$  and  $1504\text{ cm}^{-1}$  are associated with the symmetric and asymmetric stretching of the carbocyclic ring, and the strong bands around  $1558\text{ cm}^{-1}$  and  $1587\text{ cm}^{-1}$  are assigned to the C=N stretching vibrations<sup>22,23</sup>. These bands are present in Co-PH film with slight shifts, confirming the embedding of phen into Co-PH. Besides, the peak at  $632\text{ cm}^{-1}$  is ascribed to  $\text{Co-O}^{2-}$  according to previous report<sup>24,25</sup>.

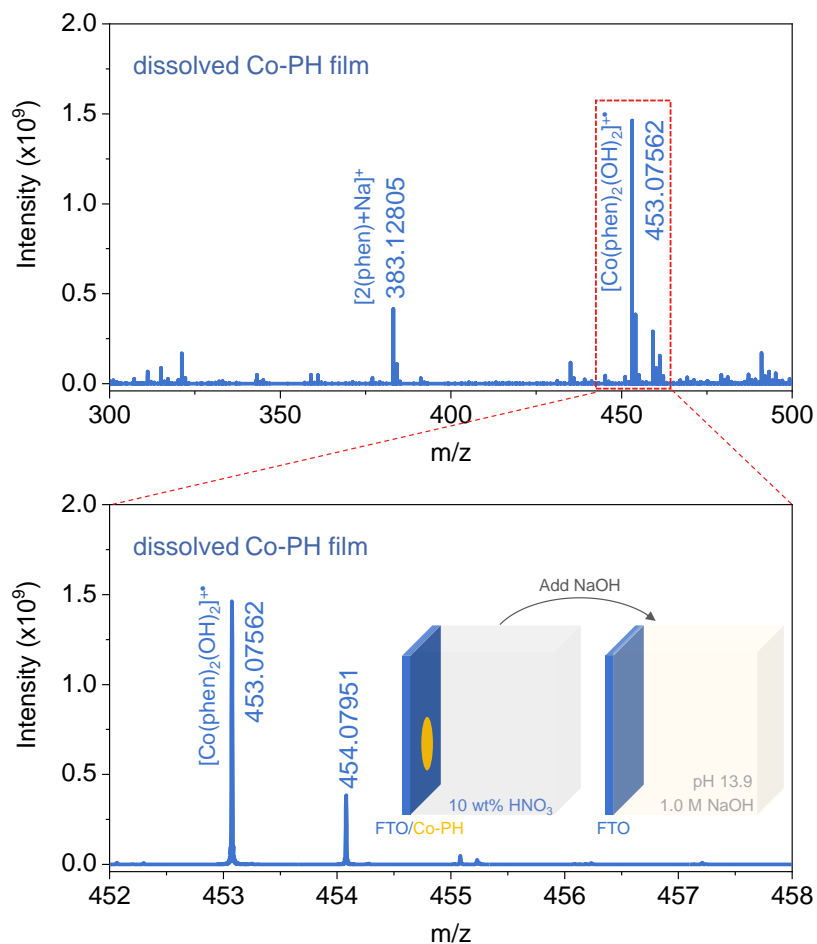

**Supplementary Fig. 49 | The FT-ICR-MS spectra of dissolved Co-PH film.** The Co-PH film was deposited at 1.7  $V_{\text{RHE}}$  in  $\text{Co}(\text{phen})_2(\text{OH})_2$ -containing 1.0 M NaOH for 10 h. For the measurements of FT-ICR-MS, deposited Co-PH film was first soaked in the 10 wt%  $\text{HNO}_3$  solutions over 10 h to dissolve. Excess NaOH solid was then added to this solution to adjust the solution pH to 13.9. The obtained solution was used for the FT-ICR-MS characterization. The spectra were recorded using dual electrospray ionization (ESI) source in the positive ion mode.

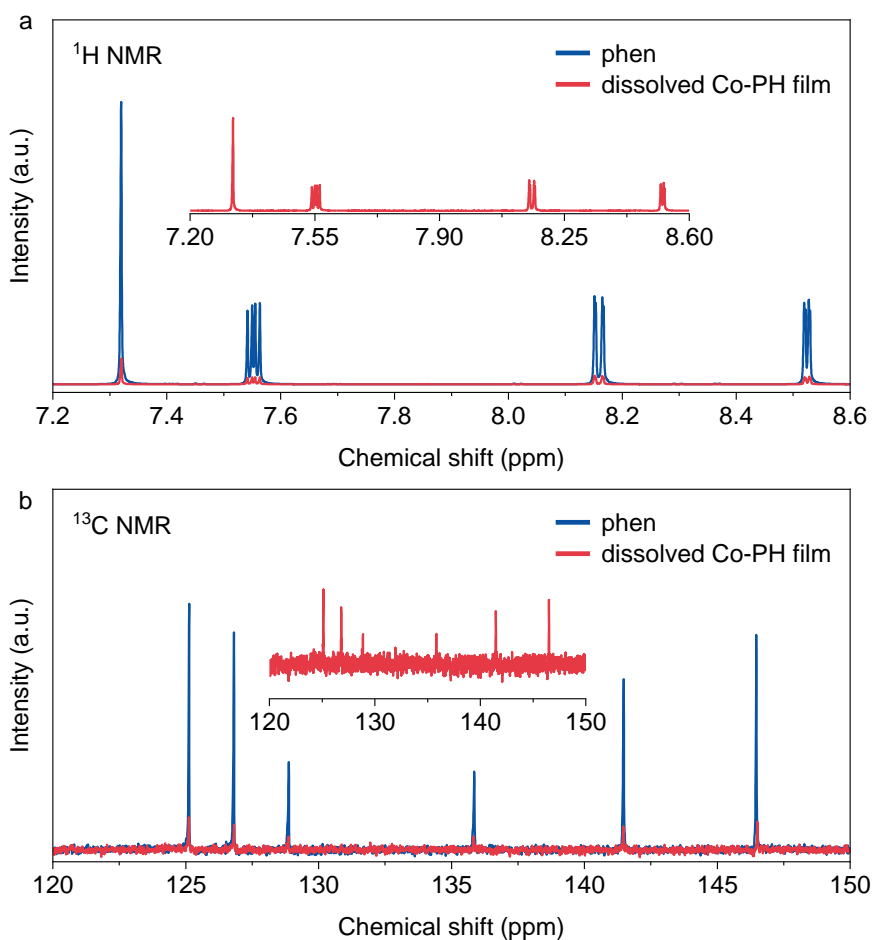

**Supplementary Fig. 50 | The NMR spectra of dissolved Co-PH film.** (a) The  $^1\text{H}$  and (b)  $^{13}\text{C}$  NMR spectra of dissolved Co-PH film. The Co-PH film was deposited at 1.7  $V_{\text{RHE}}$  in  $\text{Co}(\text{phen})_2(\text{OH})_2$ -containing 1.0 M NaOH for 10 h. For the measurements of NMR measurements, typically, deposited Co-PH film was first soaked in the 5 wt%  $\text{HNO}_3$  solutions containing 95 wt%  $\text{D}_2\text{O}$  over 10 h to dissolve. The obtained solution was used for the NMR measurements. Phen powder was also dissolved in the 5 wt%  $\text{HNO}_3$  solutions containing 95 wt%  $\text{D}_2\text{O}$  for NMR tests.

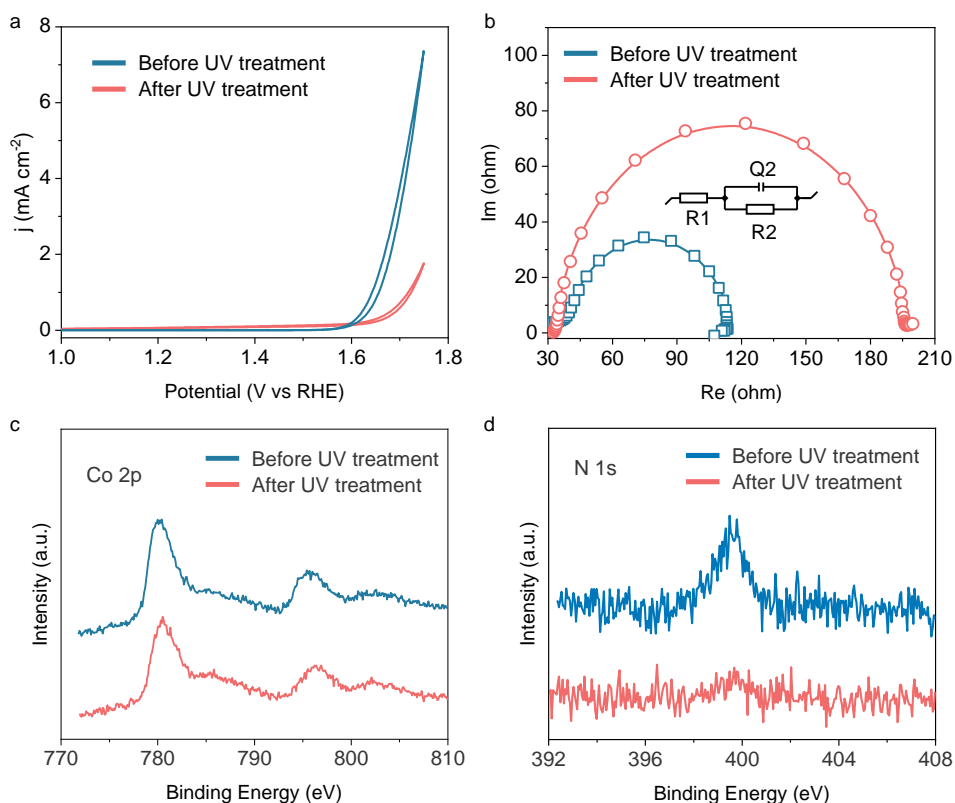

**Supplementary Fig. 51 | Decomposition of phen ligand in Co-PH film by UV irradiation. (a)** The CVs of Co-PH (prepared by 10 min deposition in  $\text{Co(phen)}_2(\text{OH})_2$ -containing 1.0 M NaOH at 1.7  $V_{\text{RHE}}$ ) in 1.0 M NaOH before and after 20 h of UV irradiation. **(b)** The impedance of Co-PH before and after 20 h of UV irradiation. The inset shows the equivalent circuit containing constant phase elements ( $Q_2$ ) and resistance ( $R_1$ ) through FTO/catalyst and ( $R_2$ ) through catalyst/redox couple. **(c)** The corresponding Co 2p, and **(d)** N 1s XPS spectra.

**Supplementary Table 8 | The  $R_1$  and  $R_2$  of Co-PH before and after UV irradiation.**

|                     | $R_1/\text{ohm}$ | $R_2/\text{ohm}$ |
|---------------------|------------------|------------------|
| Before UV treatment | 38.43            | 77.04            |
| After UV treatment  | 33.43            | 163.5            |

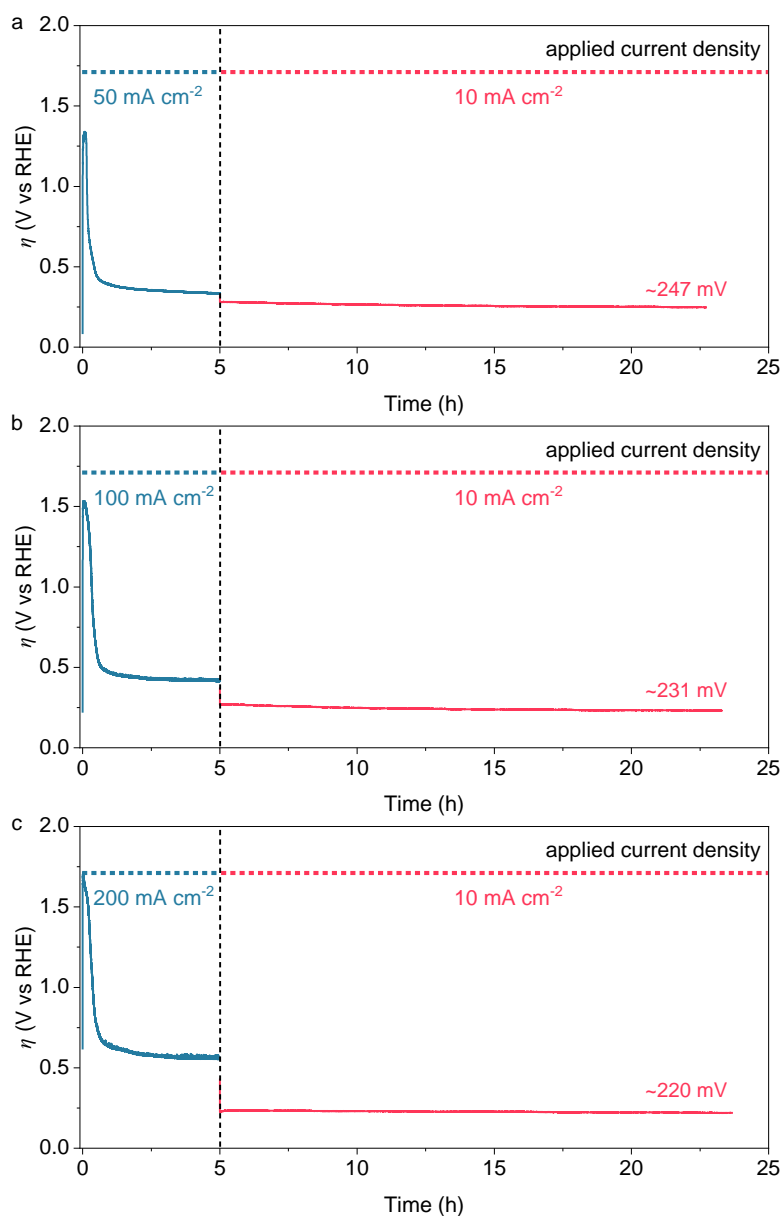

**Supplementary Fig. 52 | The stability tests of Co-PH on FTO.** The Co-PH was in-situ deposited on bare FTO at (a) 50 mA cm<sup>-2</sup>, (b) 100 mA cm<sup>-2</sup>, (c) 200 mA cm<sup>-2</sup> for 5 h and thereafter operated at 10 mA cm<sup>-2</sup> in Co(phen)<sub>2</sub>(OH)<sub>2</sub>-containing 1.0 M NaOH, respectively.



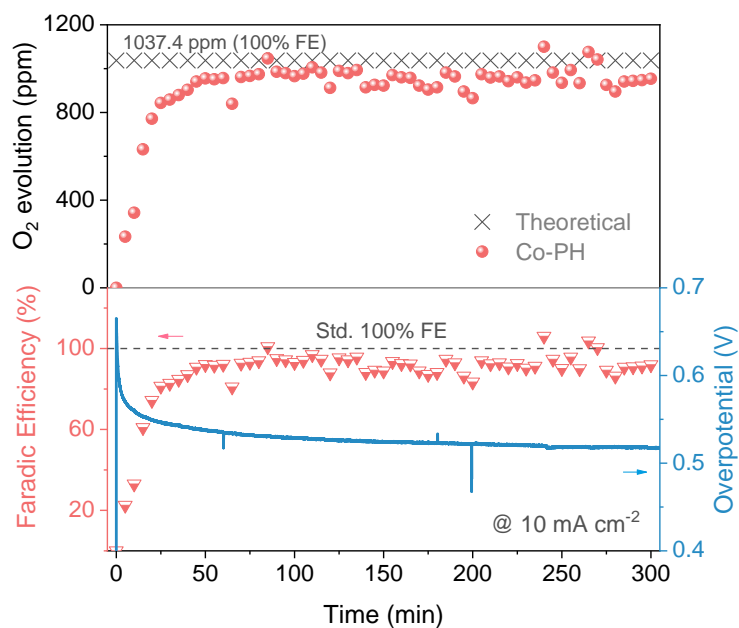

**Supplementary Fig. 53 | Online GC monitoring oxygen evolution and faradaic efficiency.**

The amount of O<sub>2</sub> evolved on Co-PH (upper), and the faradic efficiency along with the OER curve at 10 mA cm<sup>-2</sup> (lower). The online GC was carried out in a gas-tight H-cell with a typical three-electrode system, and the content of O<sub>2</sub> during the in-situ deposition process of Co-PH on FTO was obtained in Co(phen)<sub>2</sub>(OH)<sub>2</sub>-containing 1.0 M NaOH. The generated O<sub>2</sub> was measured at 5 min intervals.

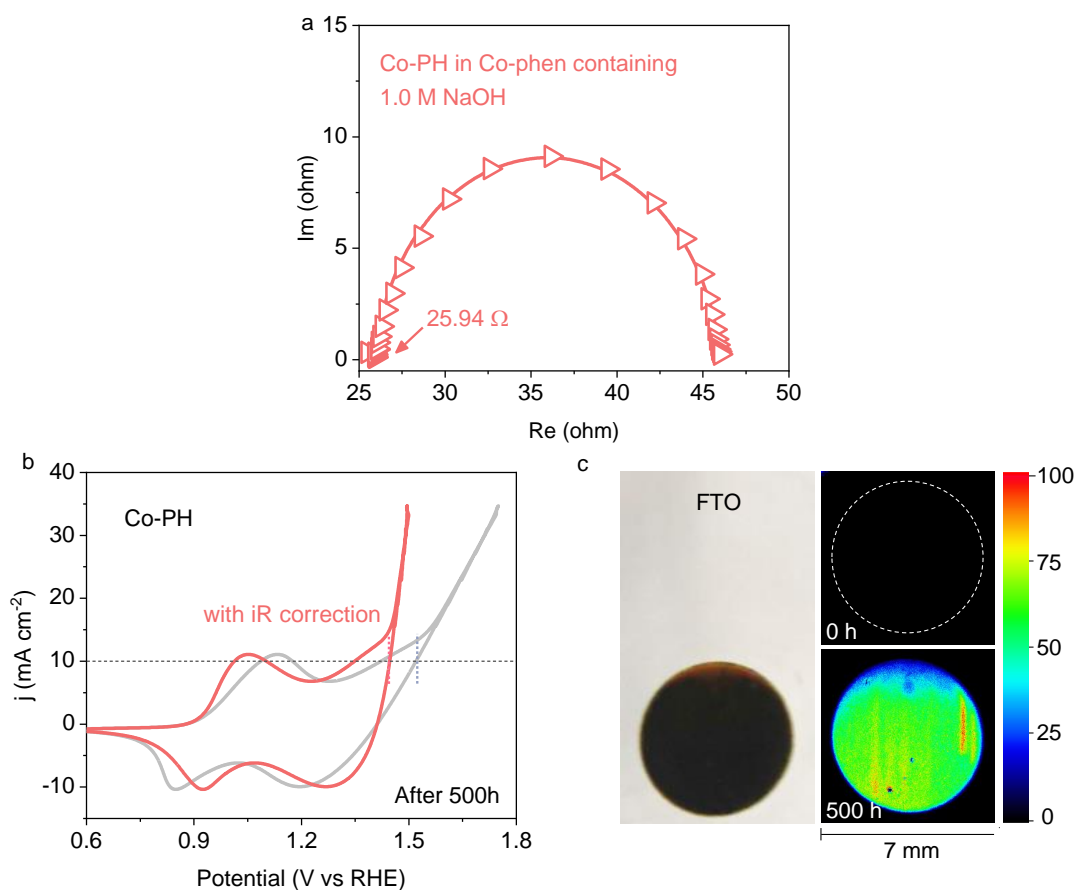

**Supplementary Fig. 54 | The effect of 500 h durability test at 10 mA cm<sup>-2</sup>.** (a) The ohmic resistance of Co-PH on FTO after 500 h of deposition/operation in Co(phen)<sub>2</sub>(OH)<sub>2</sub>-containing 1.0 M NaOH. (b) The corresponding CV curves. Noting that the overpotential at 10 mA cm<sup>-2</sup> was acquired from the backward scan. (c) The corresponding photographs and composition mapping (by XRF) of Co-PH after the 500 h stability test. The color bar indicates the distribution of the Co element.

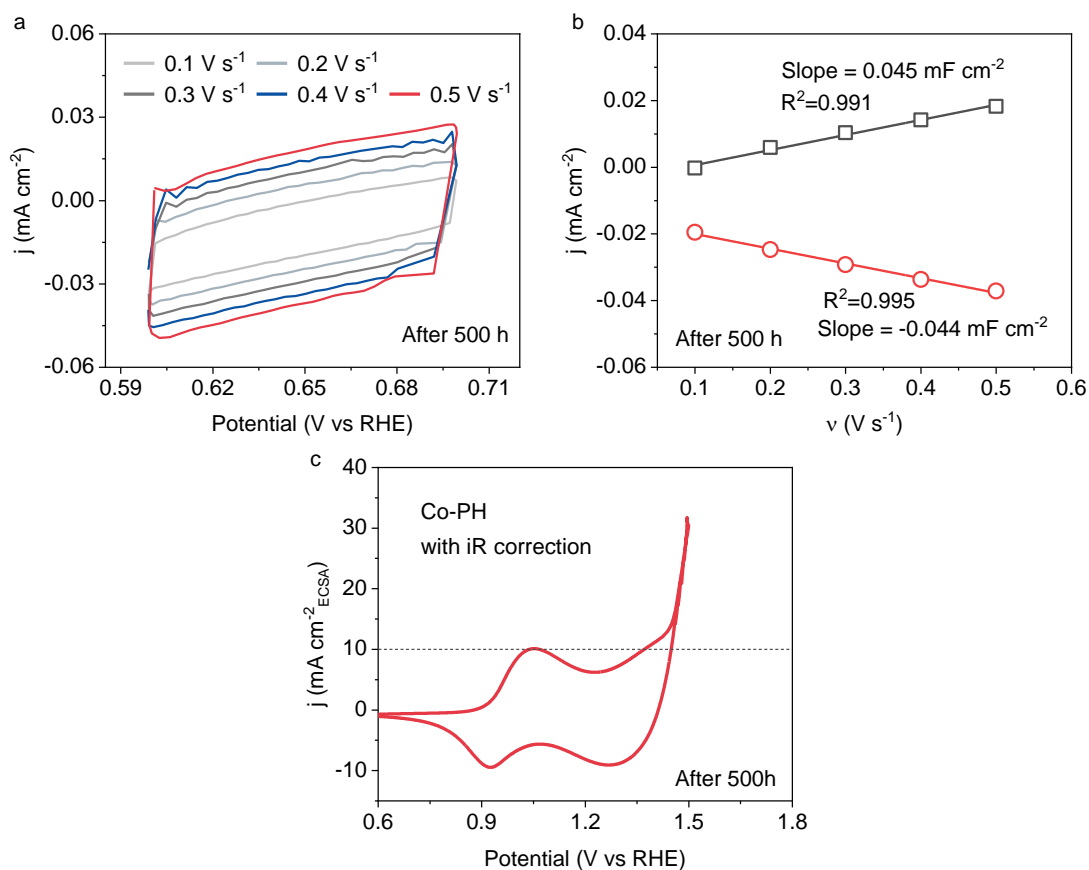

**Supplementary Fig. 55 | The intrinsic activity of Co-PH on FTO with  $iR$  correction after 500 h of operation at 10 mA cm<sup>-2</sup>. (a)** CV curves of Co-PH (after 500 h of deposition in a non-Faradic region (0.6 ~ 0.7 V)) in 1.0 M NaOH at a scan rate of 0.1 V s<sup>-1</sup> to 0.5 V s<sup>-1</sup>. **(b)** Linear fitting of the cathodic and anodic charging current density at 0.65 V<sub>RHE</sub> as a function of scan rate. **(c)** The ECSA-normalized CV curves of Co-PH after 500 h of deposition. Noting that the overpotential at 10 mA cm<sup>-2</sup> was acquired from the backward scan.

**Supplementary Table 9 | The comparison of activity and stability of Co-based catalysts in alkaline electrolytes.**

| Catalyst                                                                     | Electrolyte | Substrate         | $\eta_{\text{geo}}$           | $\eta_{\text{ECSA}}$             | Stability | Ref.      |
|------------------------------------------------------------------------------|-------------|-------------------|-------------------------------|----------------------------------|-----------|-----------|
| Co-PH                                                                        | 1 M NaOH    | FTO               | 216                           | 218                              | > 1600 h  | This work |
| Co-PH                                                                        | 1 M NaOH    | FTO               | 237 @ 20 mA cm <sup>-2</sup>  | 239 @ 20 mA cm <sup>-2</sup>     | NA        | This work |
| Co-PH                                                                        | 1 M NaOH    | FTO               | 260 @ 30 mA cm <sup>-2</sup>  | 263 @ 30 mA cm <sup>-2</sup>     | NA        | This work |
| CoOOH                                                                        | 0.1 M KOH   | Au                | 550                           | NA                               | NA        | 26        |
| Porous Co-P                                                                  | 1 M KOH     | Co foam           | NA                            | 380 @ 0.0269 mA cm <sup>-2</sup> | ~3000 h   | 27        |
| Ag doped CoOOH                                                               | 1 M KOH     | Au                | 256                           | NA                               | ~ 2 h     | 28        |
| Cu doped CoOOH                                                               | 1 M KOH     | Cu                | 322                           | NA                               | NA        | 28        |
| Fe-Co <sub>3</sub> O <sub>4</sub> HHNPs                                      | 1 M KOH     | GCE               | 262                           | 300 @ 0.033 mA cm <sup>-2</sup>  | ~ 50 h    | 29        |
| Co-TiO <sub>2</sub>                                                          | 1 M KOH     | CP                | 332                           | NA                               | ~ 45 h    | 30        |
| CoCo-NS                                                                      | 1 M KOH     | GCE               | ~360                          | NA                               | ~ 13 h    | 31        |
| NiCo NS                                                                      | 1 M KOH     | GCE               | ~325                          | ~330                             | ~ 13 h    | 31        |
| CoMn LDH                                                                     | 1 M KOH     | GCE               | 324                           | NA                               | ~ 14 h    | 32        |
| CoFe LDH                                                                     | 0.1 M KOH   | GCE               | 404                           | NA                               | NA        | 33        |
| CoFe LDH                                                                     | 1 M KOH     | GCE               | 321                           | NA                               | NA        | 34        |
| FeCo LDH                                                                     | 1 M KOH     | GCE               | 334                           | NA                               | NA        | 35        |
| FeCo (0.38% Fe <sup>2+</sup> )                                               | 1 M KOH     | CP                | 266                           | NA                               | NA        | 36        |
| Boronized NiFe                                                               | 1 M KOH     | NiFe sheet        | ~270                          | 309                              | ~3000 h   | 37        |
| 3DGN/CoAl-NS                                                                 | 1 M KOH     | GCE               | 250                           | NA                               | ~ 30 h    | 38        |
| LiCoCl <sub>1.8</sub> Cl <sub>0.2</sub>                                      | 1 M KOH     | GCE               | 290 @ 20 mA cm <sup>-2</sup>  | NA                               | ~500 h    | 39        |
| LiCoCl <sub>1.8</sub> Cl <sub>0.2</sub>                                      | 1 M KOH     | GCE               | 280                           | 280                              | NA        | 39        |
| G-FeCoW                                                                      | 1 M KOH     | Au                | 315                           | NA                               | NA        | 35        |
| G-FeCoW                                                                      | 1 M KOH     | FTO               | 314 @ 1.0 mA cm <sup>-2</sup> | NA                               | NA        | 35        |
| G-FeCoW                                                                      | 1 M KOH     | GCE               | 223                           | NA                               | NA        | 35        |
| G-FeCoW                                                                      | 1 M KOH     | Au-plated Ni foam | 191 @ 30 mA cm <sup>-2</sup>  | NA                               | ~500 h    | 35        |
| CoFeO@BP                                                                     | 1 M KOH     | GCE               | 266                           | NA                               | ~ 24 h    | 40        |
| CoSe <sub>2</sub>                                                            | 1 M NaOH    | GCE               | ~380                          | NA                               | ~ 8 h     | 41        |
| CoSe <sub>2</sub> -D <sub>Fe</sub> -V <sub>Co</sub>                          | 1 M NaOH    | GCE               | ~310                          | NA                               | ~ 8 h     | 41        |
| NiCoP/C                                                                      | 1 M KOH     | GCE               | ~330                          | NA                               | ~ 10 h    | 42        |
| (Ni <sub>2</sub> Co <sub>1</sub> ) <sub>0.925</sub> Fe <sub>0.075</sub> -MOF | 1 M KOH     | GCE               | 257                           | NA                               | ~ 35 h    | 43        |

|                            |         |         |     |    |        |    |
|----------------------------|---------|---------|-----|----|--------|----|
| Ni(Fe)OOH-FeS <sub>x</sub> | 1 M KOH | Ni foam | 220 | NA | ~ 16 h | 44 |
| FeCoMoW                    | 1 M KOH | CP      | 212 | NA | NA     | 36 |

Note: The overpotential and stability are obtained at 10 mA cm<sup>-2</sup> if there are no specific notes.

FTO: Fluorine-doped tin oxide glass

CP: Carbon paper.

GCE: Glass carbon electrode.

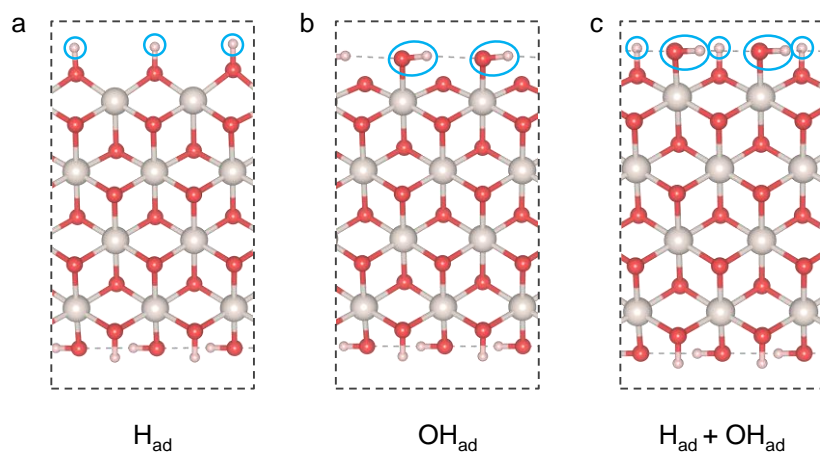

**Supplementary Fig. 56 | Structures of different surface phases on  $\text{CoO}_2$ .** (a) surface O sites are adsorbed with H ( $\text{H}_{\text{ad}}$ ) to form bridge OH species; (b) surface Co sites are adsorbed with atop OH ( $\text{OH}_{\text{ad}}$ ), and (c) both  $\text{H}_{\text{ad}}$  and  $\text{OH}_{\text{ad}}$  are existing. The adsorbates of surface phases are highlighted by light blue circles on the top views.

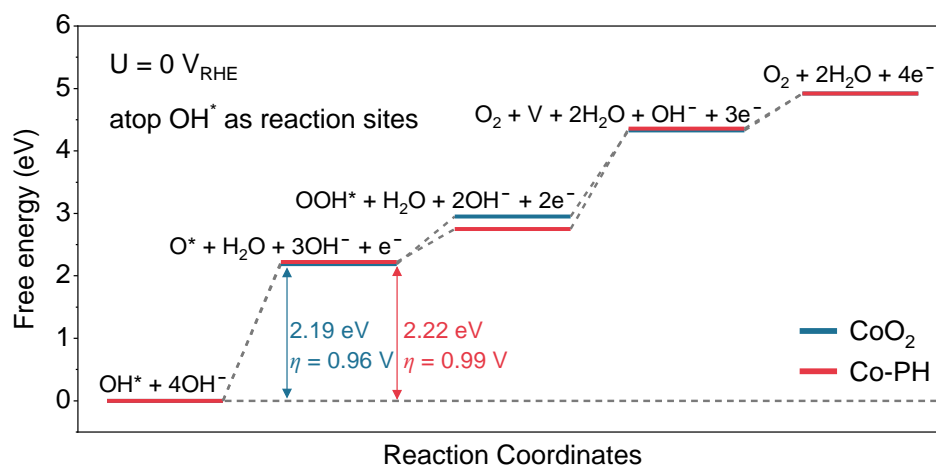

**Supplementary Fig. 57 | The reaction free-energy diagrams for OER on CoO<sub>2</sub> and Co-PH with atop OH\* as reaction centers at 0 V<sub>RHE</sub>.**

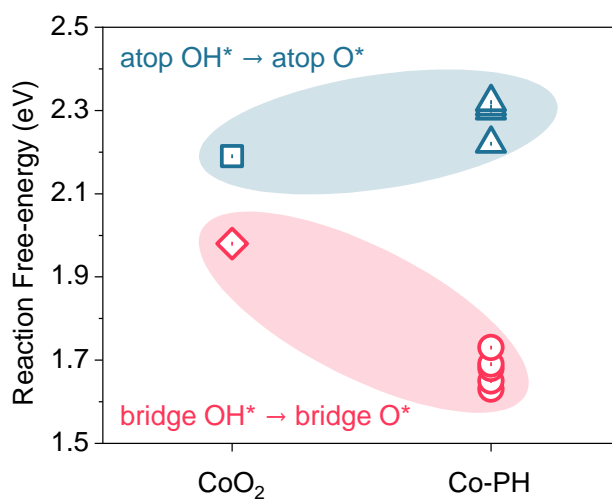

**Supplementary Fig. 58 | The reaction free-energy for deprotonation of atop OH\* and bridged OH\* on CoO<sub>2</sub> and Co-PH.**

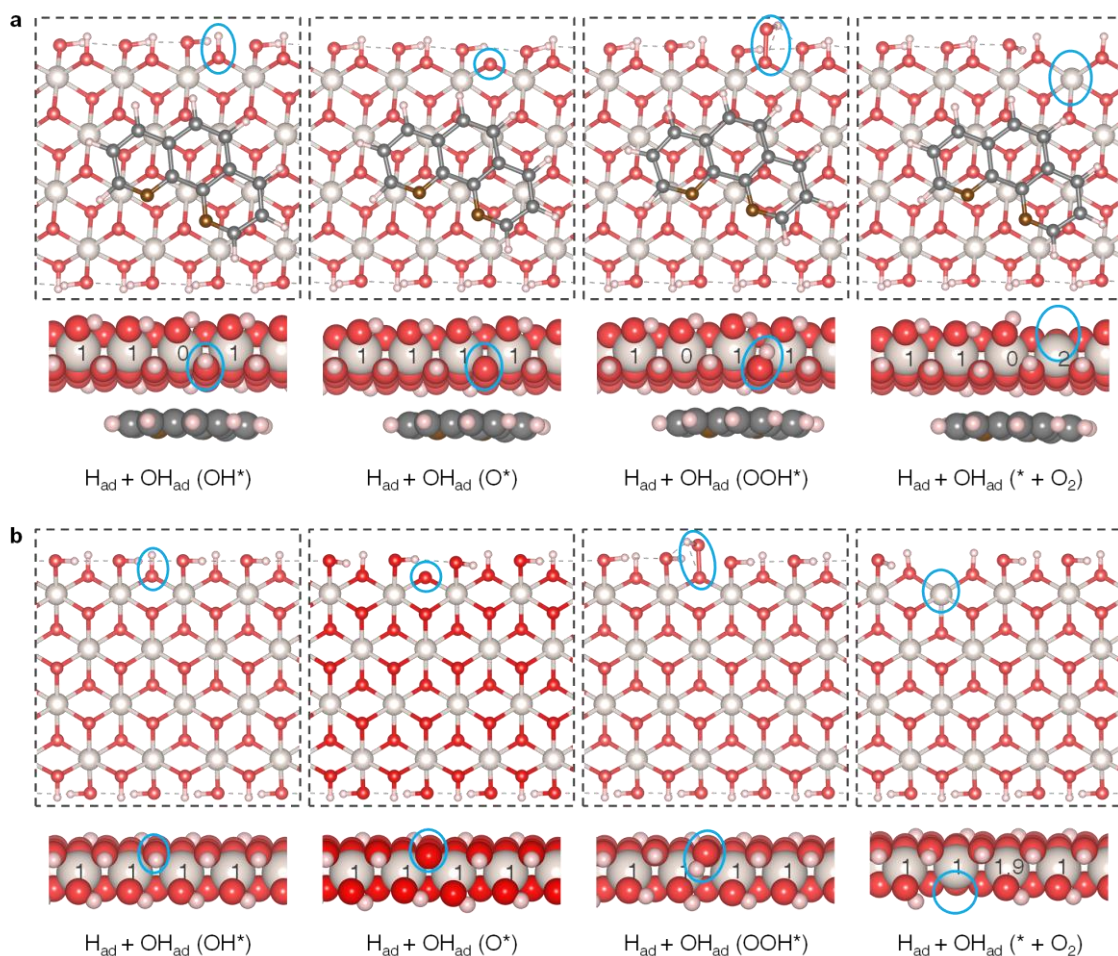

**Supplementary Fig. 59 | Structures of reaction intermediates for OER on Co-PH and CoO<sub>2</sub>.**

The structures of reaction intermediates for OER on **(a)** Co-PH and **(b)** CoO<sub>2</sub>. The adsorbates are highlighted by light blue circles on the top views (upper) and side views (under). The number labeled on atoms are their magnetic moments in the Bohr magnetic ( $\mu_B$ ). The magnetic moment of Co<sup>4+</sup> is 1  $\mu_B$ , and the magnetic moment of 0  $\mu_B$  or 1.9  $\mu_B$  indicates the Co<sup>3+</sup>.



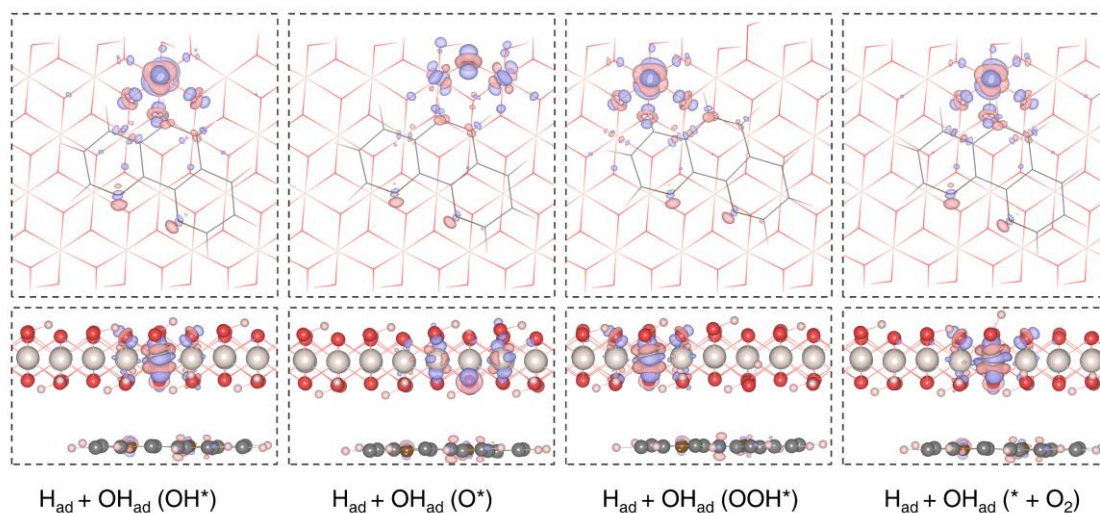

**Supplementary Fig. 60 | Charge density differences of Co-PH during the OER process.** The upper one is the top view and the bottom one is the side view. The purple isosurfaces correspond to charge densities of  $0.011 \text{ e/Bohr}^3$  and represent an increase in the total charge density. The orange isosurfaces correspond to charge densities of  $-0.011 \text{ e/Bohr}^3$  and represent a decrease in the total charge density.

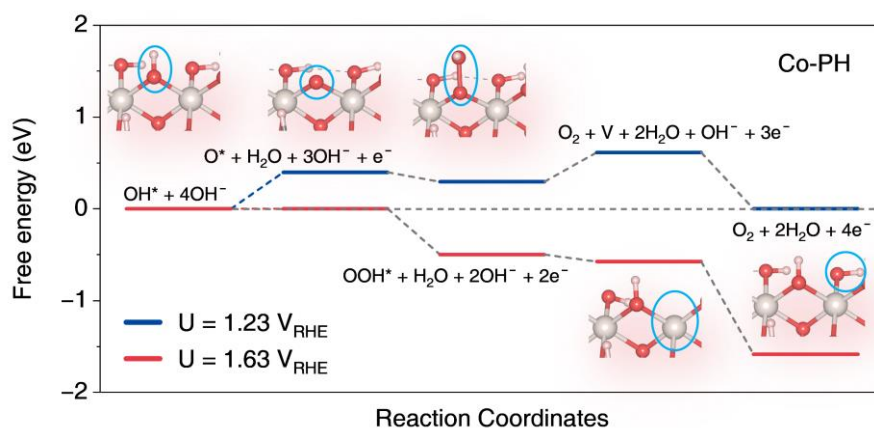

**Supplementary Fig. 61 | Reaction free-energy diagrams for OER on Co-PH at different potentials.** The reaction free energies at 1.23  $\text{V}_{\text{RHE}}$  are in blue, and 1.63  $\text{V}_{\text{RHE}}$  are in red. Insets are the corresponding enlarged models.

**Supplementary Table 10 | Magnetic moment ( $\mu_B$ ) of Co atoms on the different reaction sites of the Co-PH OER models which are corresponding to the models in Supplementary Figs. 58-65.**

| Co <sup>1</sup> -O <sup>5</sup> -Co <sup>2</sup>    | Co <sup>1</sup> | Co <sup>2</sup> | Co <sup>3</sup> | Co <sup>4</sup> | Co <sup>5</sup> | Co <sup>6</sup> | Co <sup>7</sup> | Co <sup>8</sup> | Co <sup>9</sup> | Co <sup>10</sup> | Co <sup>11</sup> | Co <sup>12</sup> | Co <sup>13</sup> | Co <sup>14</sup> | Co <sup>15</sup> | Co <sup>16</sup> |
|-----------------------------------------------------|-----------------|-----------------|-----------------|-----------------|-----------------|-----------------|-----------------|-----------------|-----------------|------------------|------------------|------------------|------------------|------------------|------------------|------------------|
| OH*                                                 | 1               | 1               | 1               | 0               | 1               | 1               | 1               | 1               | 1               | 1                | 1                | 1                | 1                | 1                | 1                | 1                |
| O*                                                  | 1               | 1               | 1               | 1               | 1               | 1               | 1               | 1               | 1               | 1                | 1                | 1                | 1                | 1                | 1                | 1                |
| OOH*                                                | 1               | 1               | 1               | 0               | 1               | 1               | 1               | 1               | 1               | 1                | 1                | 1                | 1                | 1                | 1                | 1                |
| V                                                   | 1               | 2               | 1               | 1               | 1               | 1               | 1               | 1               | 1               | 1                | 1                | 0                | 1                | 1                | 1                | 1                |
| Co <sup>3</sup> -O <sup>6</sup> -Co <sup>1</sup>    | Co <sup>1</sup> | Co <sup>2</sup> | Co <sup>3</sup> | Co <sup>4</sup> | Co <sup>5</sup> | Co <sup>6</sup> | Co <sup>7</sup> | Co <sup>8</sup> | Co <sup>9</sup> | Co <sup>10</sup> | Co <sup>11</sup> | Co <sup>12</sup> | Co <sup>13</sup> | Co <sup>14</sup> | Co <sup>15</sup> | Co <sup>16</sup> |
| OH*                                                 | 1               | 1               | 1               | 0               | 1               | 1               | 1               | 1               | 1               | 1                | 1                | 1                | 1                | 1                | 1                | 1                |
| O*                                                  | 1               | 1               | 1               | 1               | 1               | 1               | 1               | 1               | 1               | 1                | 1                | 1                | 1                | 1                | 1                | 1                |
| OOH*                                                | 1               | 0               | 1               | 1               | 1               | 1               | 1               | 1               | 1               | 1                | 1                | 1                | 1                | 1                | 1                | 1                |
| V                                                   | 2               | 1               | 1               | 0               | 1               | 1               | 1               | 1               | 1               | 1                | 1                | 1                | 1                | 1                | 1                | 1                |
| Co <sup>2</sup> -O <sup>7</sup> -Co <sup>4</sup>    | Co <sup>1</sup> | Co <sup>2</sup> | Co <sup>3</sup> | Co <sup>4</sup> | Co <sup>5</sup> | Co <sup>6</sup> | Co <sup>7</sup> | Co <sup>8</sup> | Co <sup>9</sup> | Co <sup>10</sup> | Co <sup>11</sup> | Co <sup>12</sup> | Co <sup>13</sup> | Co <sup>14</sup> | Co <sup>15</sup> | Co <sup>16</sup> |
| OH*                                                 | 1               | 1               | 1               | 0               | 1               | 1               | 1               | 1               | 1               | 1                | 1                | 1                | 1                | 1                | 1                | 1                |
| O*                                                  | 1               | 1               | 1               | 1               | 1               | 1               | 1               | 1               | 1               | 1                | 1                | 1                | 1                | 1                | 1                | 1                |
| OOH*                                                | 1               | 1               | 0               | 1               | 1               | 1               | 1               | 1               | 1               | 1                | 1                | 1                | 1                | 1                | 1                | 1                |
| V                                                   | 1               | 0               | 1               | 2               | 1               | 1               | 1               | 1               | 1               | 1                | 1                | 1                | 1                | 1                | 1                | 1                |
| Co <sup>3</sup> -O <sup>8</sup> -Co <sup>4</sup>    | Co <sup>1</sup> | Co <sup>2</sup> | Co <sup>3</sup> | Co <sup>4</sup> | Co <sup>5</sup> | Co <sup>6</sup> | Co <sup>7</sup> | Co <sup>8</sup> | Co <sup>9</sup> | Co <sup>10</sup> | Co <sup>11</sup> | Co <sup>12</sup> | Co <sup>13</sup> | Co <sup>14</sup> | Co <sup>15</sup> | Co <sup>16</sup> |
| OH*                                                 | 1               | 1               | 1               | 0               | 1               | 1               | 1               | 1               | 1               | 1                | 1                | 1                | 1                | 1                | 1                | 1                |
| O*                                                  | 1               | 1               | 1               | 1               | 1               | 1               | 1               | 1               | 1               | 1                | 1                | 1                | 1                | 1                | 1                | 1                |
| OOH*                                                | 1               | 0               | 1               | 1               | 1               | 1               | 1               | 1               | 1               | 1                | 1                | 1                | 1                | 1                | 1                | 1                |
| V                                                   | 1               | 1               | 2               | 0               | 1               | 1               | 1               | 1               | 1               | 1                | 1                | 1                | 1                | 1                | 1                | 1                |
| Co <sup>13</sup> -O <sup>33</sup> -Co <sup>14</sup> | Co <sup>1</sup> | Co <sup>2</sup> | Co <sup>3</sup> | Co <sup>4</sup> | Co <sup>5</sup> | Co <sup>6</sup> | Co <sup>7</sup> | Co <sup>8</sup> | Co <sup>9</sup> | Co <sup>10</sup> | Co <sup>11</sup> | Co <sup>12</sup> | Co <sup>13</sup> | Co <sup>14</sup> | Co <sup>15</sup> | Co <sup>16</sup> |
| OH*                                                 | 1               | 1               | 1               | 0               | 1               | 1               | 1               | 1               | 1               | 1                | 1                | 1                | 1                | 1                | 1                | 1                |
| O*                                                  | 1               | 1               | 1               | 1               | 1               | 1               | 1               | 1               | 1               | 1                | 1                | 1                | 1                | 1                | 1                | 1                |
| OOH*                                                | 0               | 1               | 1               | 1               | 1               | 1               | 1               | 1               | 1               | 1                | 1                | 1                | 1                | 1                | 1                | 1                |
| V                                                   | 1               | 1               | 1               | 1               | 1               | 1               | 1               | 1               | 1               | 1                | 1                | 1                | 1                | 2                | 1                | 0                |
| Co <sup>14</sup> -O <sup>34</sup> -Co <sup>15</sup> | Co <sup>1</sup> | Co <sup>2</sup> | Co <sup>3</sup> | Co <sup>4</sup> | Co <sup>5</sup> | Co <sup>6</sup> | Co <sup>7</sup> | Co <sup>8</sup> | Co <sup>9</sup> | Co <sup>10</sup> | Co <sup>11</sup> | Co <sup>12</sup> | Co <sup>13</sup> | Co <sup>14</sup> | Co <sup>15</sup> | Co <sup>16</sup> |
| OH*                                                 | 1               | 1               | 1               | 0               | 1               | 1               | 1               | 1               | 1               | 1                | 1                | 1                | 1                | 1                | 1                | 1                |
| O*                                                  | 1               | 1               | 1               | 1               | 1               | 1               | 1               | 1               | 1               | 1                | 1                | 1                | 1                | 1                | 1                | 1                |
| OOH*                                                | 1               | 1               | 1               | 0               | 1               | 1               | 1               | 1               | 1               | 1                | 1                | 1                | 1                | 1                | 1                | 1                |
| V                                                   | 1               | 1               | 1               | 1               | 1               | 1               | 1               | 1               | 1               | 1                | 1                | 1                | 1                | 2                | 1                | 0                |
| Co <sup>15</sup> -O <sup>35</sup> -Co <sup>16</sup> | Co <sup>1</sup> | Co <sup>2</sup> | Co <sup>3</sup> | Co <sup>4</sup> | Co <sup>5</sup> | Co <sup>6</sup> | Co <sup>7</sup> | Co <sup>8</sup> | Co <sup>9</sup> | Co <sup>10</sup> | Co <sup>11</sup> | Co <sup>12</sup> | Co <sup>13</sup> | Co <sup>14</sup> | Co <sup>15</sup> | Co <sup>16</sup> |
| OH*                                                 | 1               | 1               | 1               | 0               | 1               | 1               | 1               | 1               | 1               | 1                | 1                | 1                | 1                | 1                | 1                | 1                |
| O*                                                  | 1               | 1               | 1               | 1               | 1               | 1               | 1               | 1               | 1               | 1                | 1                | 1                | 1                | 1                | 1                | 1                |
| OOH*                                                | 1               | 1               | 1               | 1               | 1               | 1               | 1               | 1               | 0               | 1                | 1                | 1                | 1                | 1                | 1                | 1                |
| V                                                   | 1               | 1               | 1               | 1               | 1               | 1               | 1               | 1               | 1               | 1                | 1                | 1                | 0                | 1                | 2                | 1                |
| Co <sup>16</sup> -O <sup>36</sup> -Co <sup>13</sup> | Co <sup>1</sup> | Co <sup>2</sup> | Co <sup>3</sup> | Co <sup>4</sup> | Co <sup>5</sup> | Co <sup>6</sup> | Co <sup>7</sup> | Co <sup>8</sup> | Co <sup>9</sup> | Co <sup>10</sup> | Co <sup>11</sup> | Co <sup>12</sup> | Co <sup>13</sup> | Co <sup>14</sup> | Co <sup>15</sup> | Co <sup>16</sup> |
| OH*                                                 | 1               | 1               | 1               | 0               | 1               | 1               | 1               | 1               | 1               | 1                | 1                | 1                | 1                | 1                | 1                | 1                |
| O*                                                  | 1               | 1               | 1               | 1               | 1               | 1               | 1               | 1               | 1               | 1                | 1                | 1                | 1                | 1                | 1                | 1                |
| OOH*                                                | 1               | 1               | 1               | 0               | 1               | 1               | 1               | 1               | 1               | 1                | 1                | 1                | 1                | 1                | 1                | 1                |
| V                                                   | 1               | 1               | 1               | 1               | 1               | 1               | 1               | 1               | 1               | 1                | 1                | 1                | 0                | 1                | 1                | 2                |

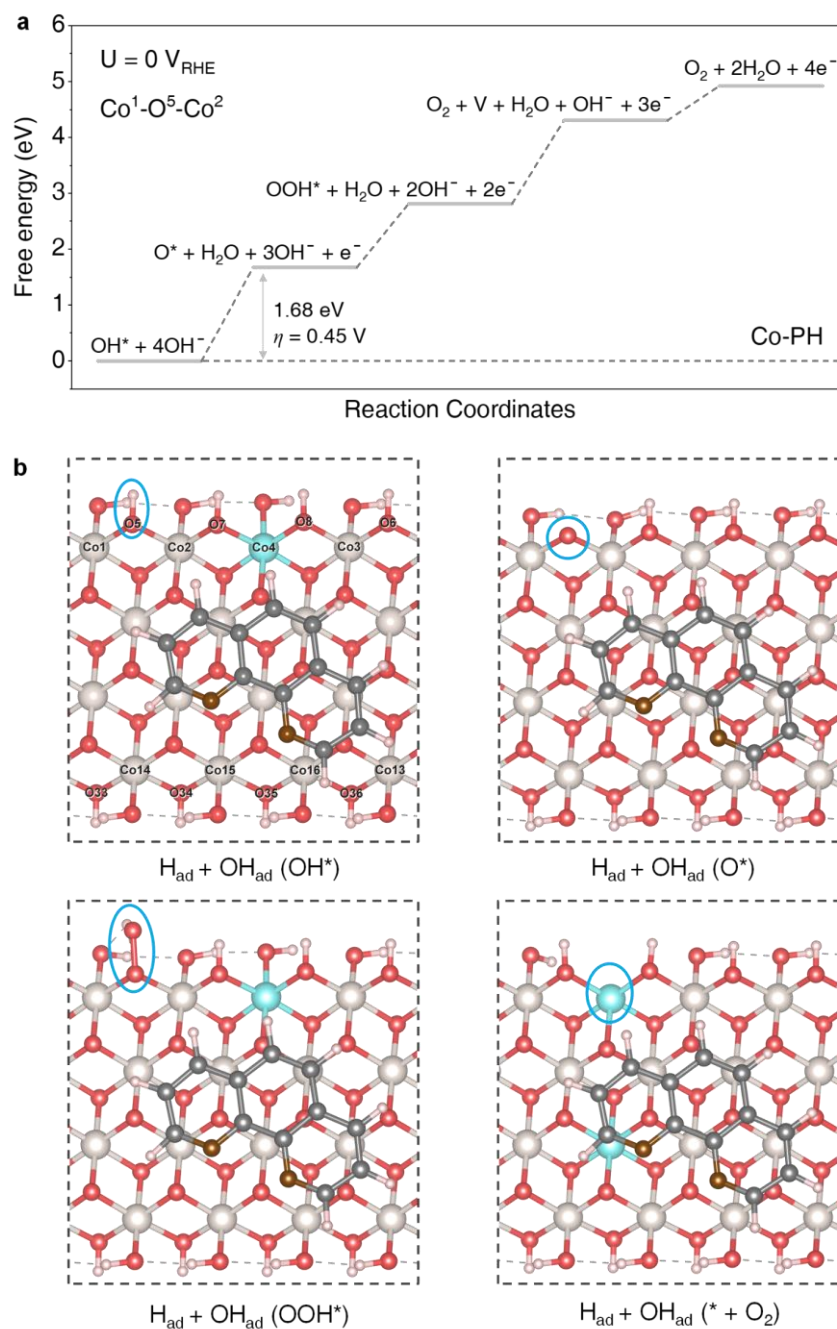

**Supplementary Fig. 62 | Reaction free-energy diagram of the  $\text{Co}^1\text{-O}^5\text{-Co}^2$  reaction site on the Co-PH at  $0 \text{ V}_{\text{RHE}}$ .** (a) The reaction free-energy diagram on the  $\text{Co}^1\text{-O}^5\text{-Co}^2$  reaction site on Co-PH and (b) the corresponding models. The reaction sites are shown with light blue circles.  $\text{Co}^{4+}$ ,  $\text{Co}^{3+}$ , N, C, O, and H are represented by silver, cyan, chocolate, gray, red, and pink balls, respectively.

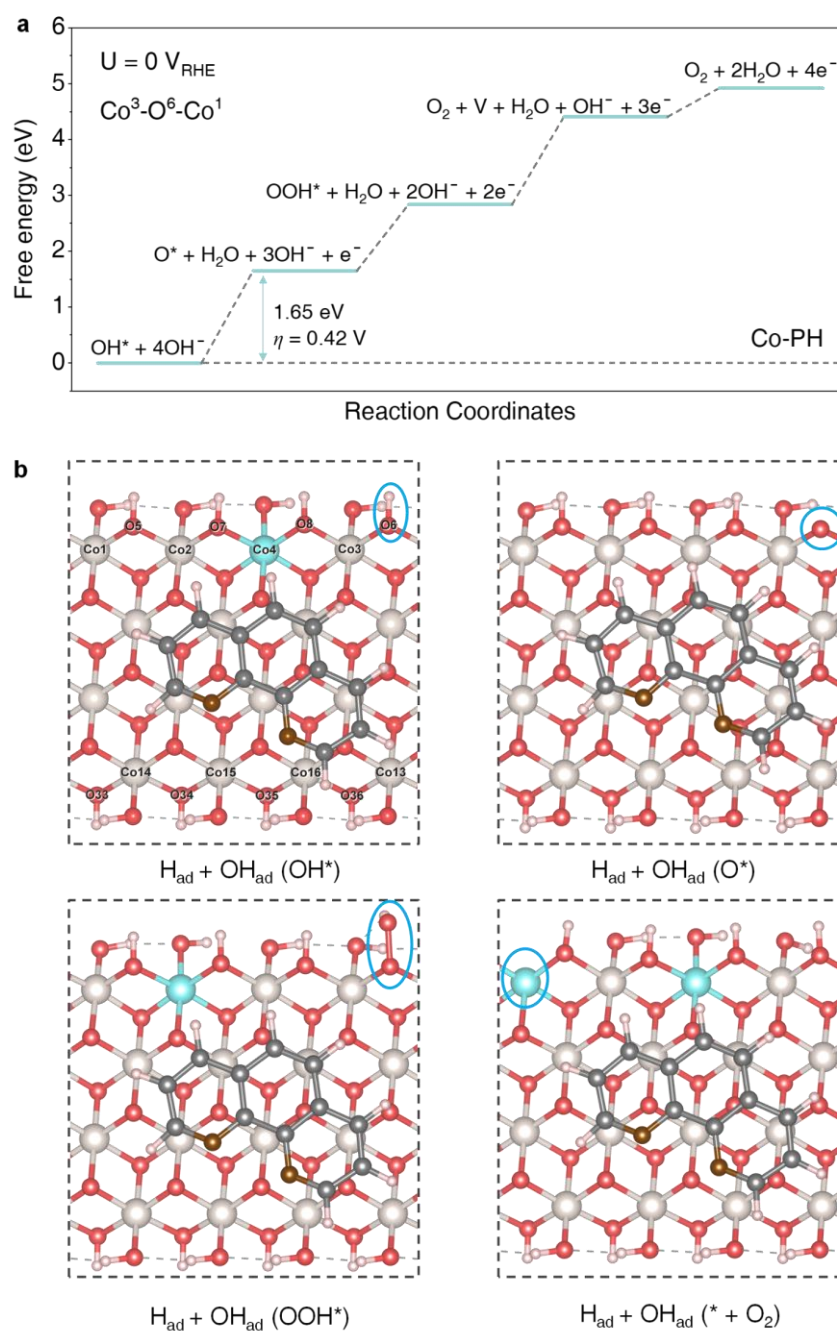

**Supplementary Fig. 63 | Reaction free-energy diagram of the  $\text{Co}^3\text{-O}^6\text{-Co}^1$  reaction site on the Co-PH at  $0 \text{ V}_{\text{RHE}}$ .** (a) The reaction free-energy diagram on the  $\text{Co}^3\text{-O}^6\text{-Co}^1$  reaction site on Co-PH and (b) the corresponding models. The reaction sites are shown with light blue circles.  $\text{Co}^{4+}$ ,  $\text{Co}^{3+}$ , N, C, O, and H are represented by silver, cyan, chocolate, gray, red, and pink balls, respectively.

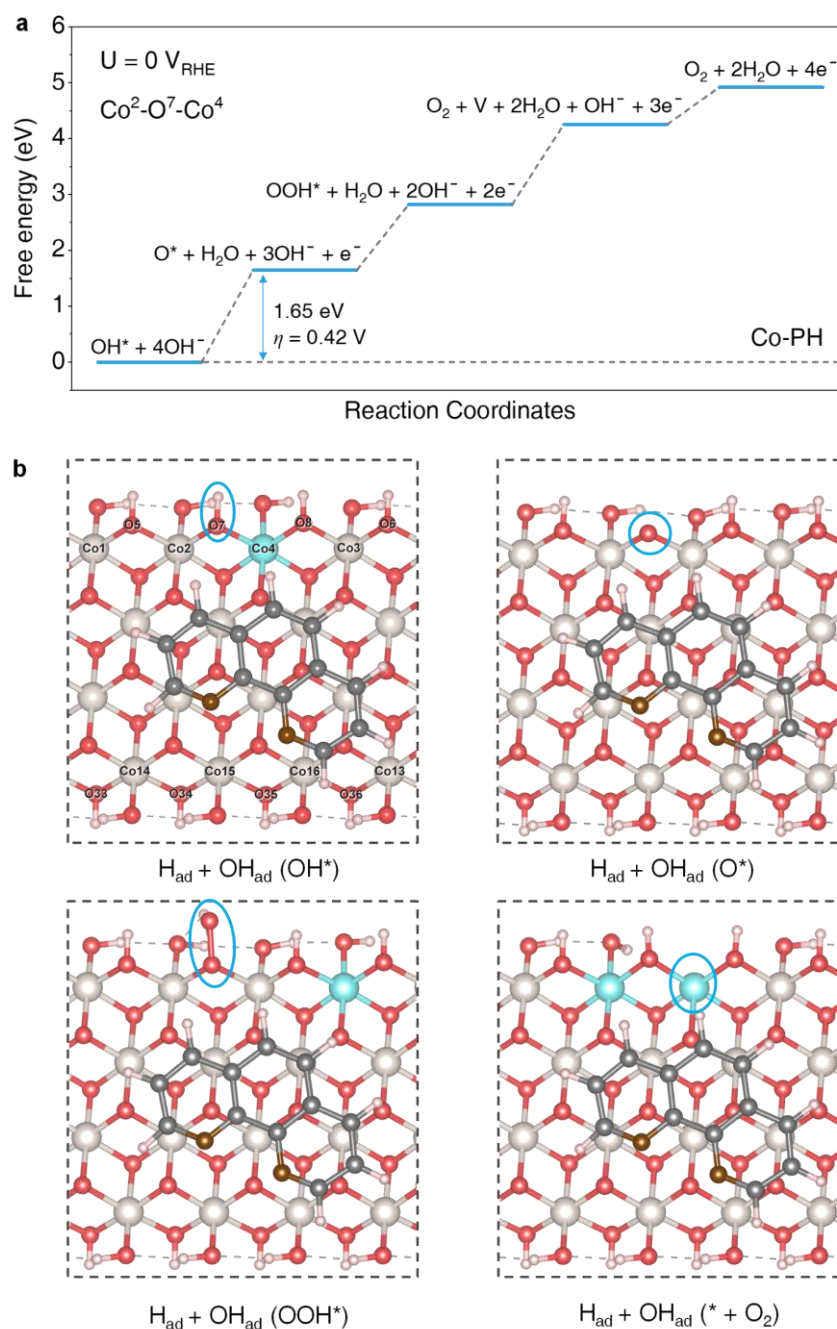

**Supplementary Fig. 64 | Reaction free-energy diagram of the  $\text{Co}^{2+}\text{-O}^{7-}\text{-Co}^4$  reaction site on the Co-PH at  $0 \text{ V}_{\text{RHE}}$ .** (a) The reaction free-energy diagram on the  $\text{Co}^{2+}\text{-O}^{7-}\text{-Co}^4$  reaction site on Co-PH and (b) the corresponding models. The reaction sites are shown with light blue circles.  $\text{Co}^{4+}$ ,  $\text{Co}^{3+}$ , N, C, O, and H are represented by silver, cyan, chocolate, gray, red, and pink balls, respectively.



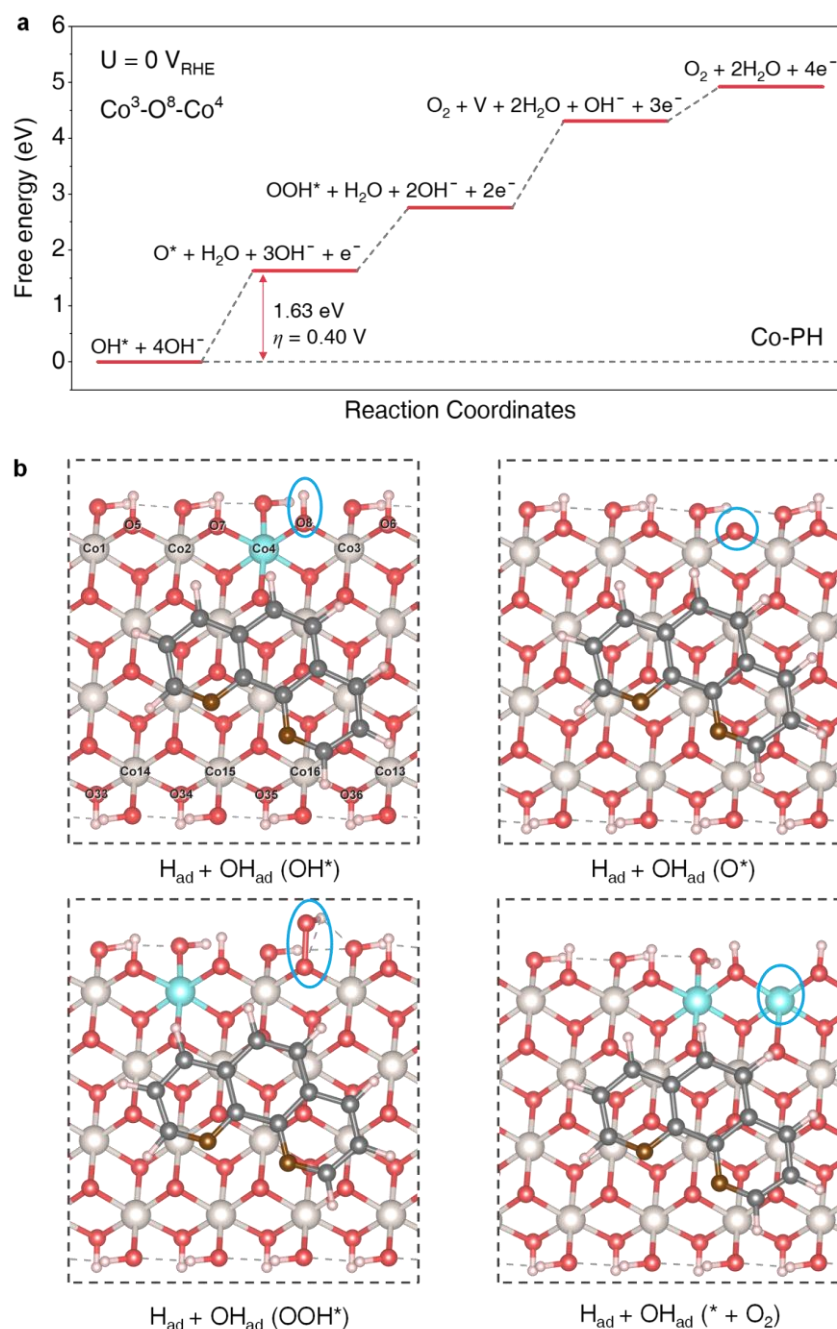

**Supplementary Fig. 65 | Reaction free-energy diagram of the Co<sup>3</sup>-O<sup>8</sup>-Co<sup>4</sup> reaction site on the Co-PH at 0 V<sub>RHE</sub>.** (a) The reaction free-energy diagram on the Co<sup>3</sup>-O<sup>8</sup>-Co<sup>4</sup> reaction site on Co-PH and (b) the corresponding models. The reaction sites are shown with light blue circles. Co<sup>4+</sup>, Co<sup>3+</sup>, N, C, O, and H are represented by silver, cyan, chocolate, gray, red, and pink balls, respectively.

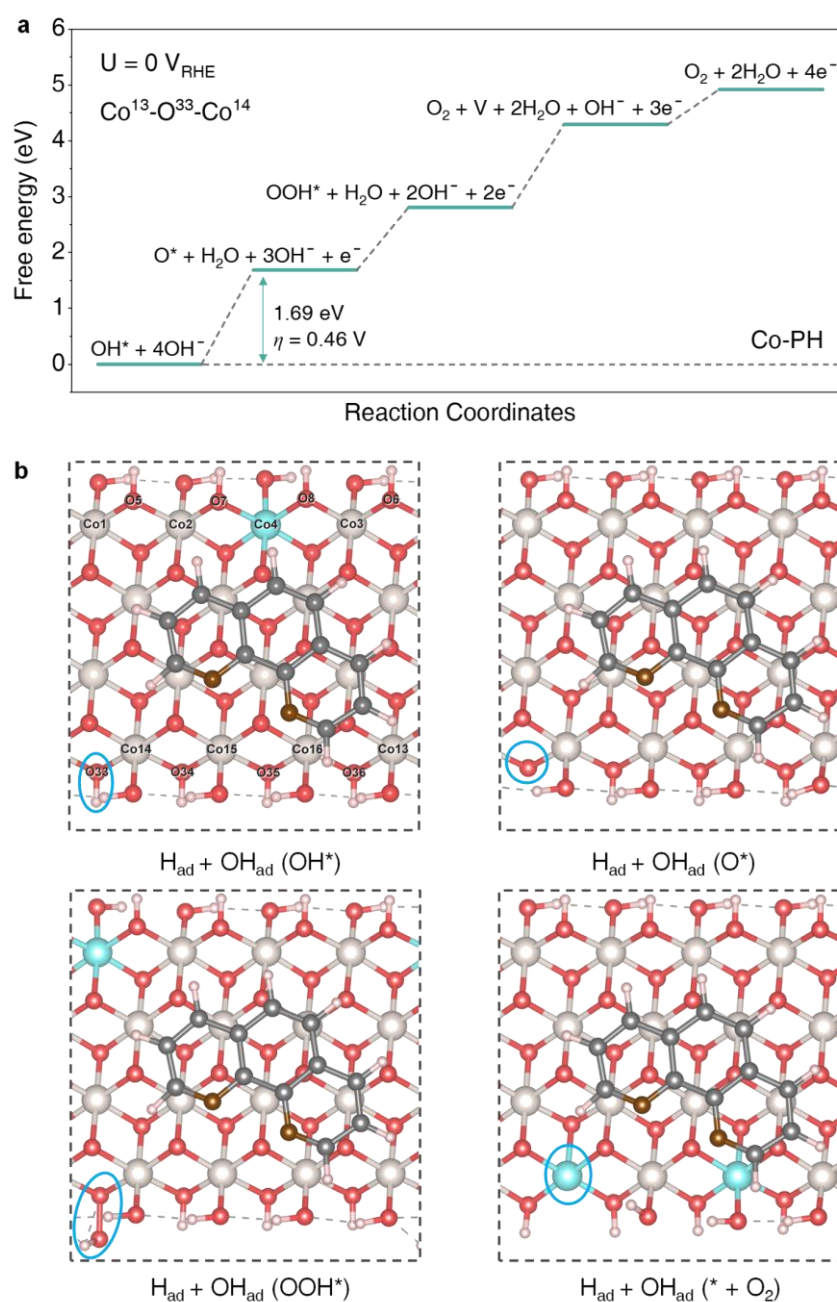

**Supplementary Fig. 66 | Reaction free-energy diagram of the  $\text{Co}^{13}\text{-O}^{33}\text{-Co}^{14}$  reaction site on the Co-PH at  $0 \text{ V}_{\text{RHE}}$ .** (a) The reaction free-energy diagram on the  $\text{Co}^{13}\text{-O}^{33}\text{-Co}^{14}$  reaction site on Co-PH and (b) the corresponding models. The reaction sites are shown with light blue circles.  $\text{Co}^{4+}$ ,  $\text{Co}^{3+}$ , N, C, O, and H are represented by silver, cyan, chocolate, gray, red, and pink balls, respectively.



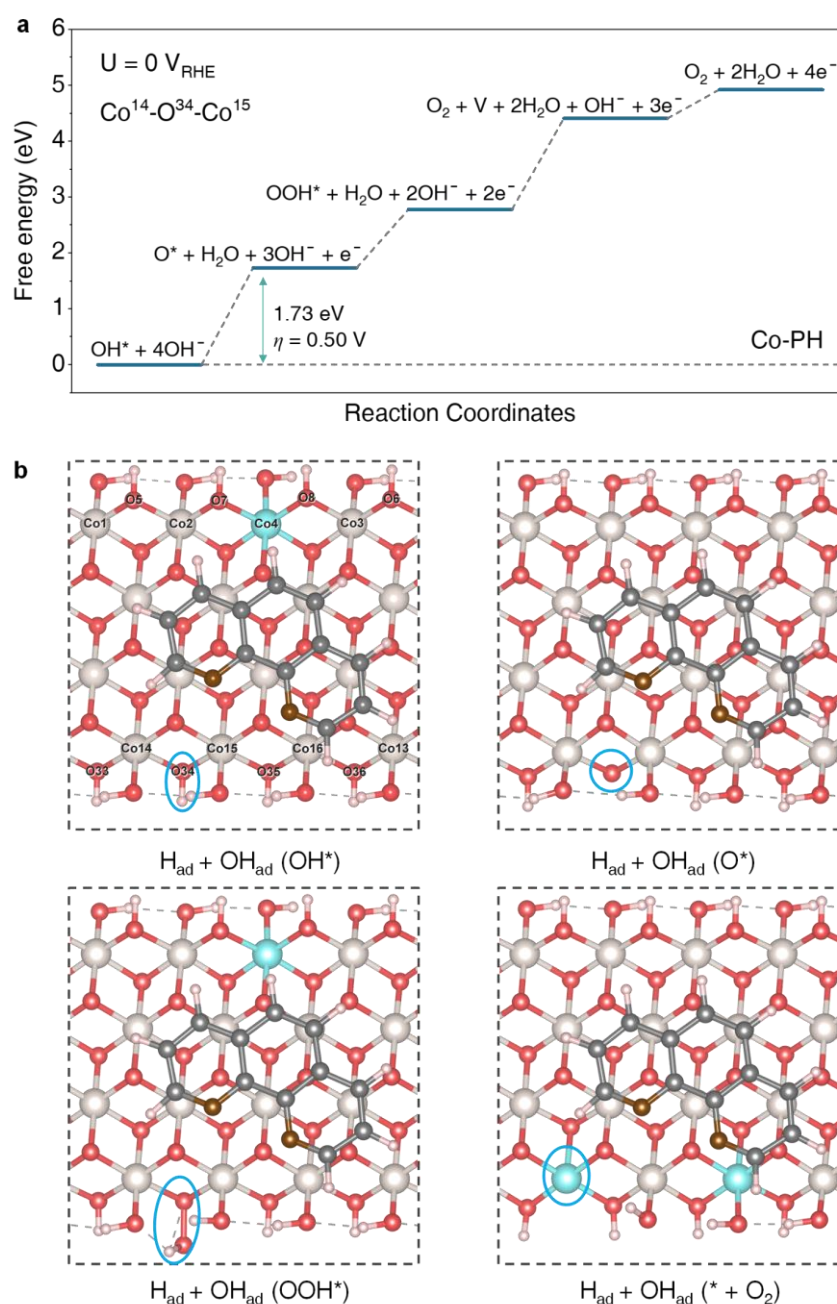

**Supplementary Fig. 67 | Reaction free-energy diagram of the  $\text{Co}^{14}\text{-O}^{34}\text{-Co}^{15}$  reaction site on the Co-PH at  $0 \text{ V}_{\text{RHE}}$ .** (a) The reaction free-energy diagram on the  $\text{Co}^{14}\text{-O}^{34}\text{-Co}^{15}$  reaction site on Co-PH and (b) the corresponding models. The reaction sites are shown with light blue circles.  $\text{Co}^{4+}$ ,  $\text{Co}^{3+}$ , N, C, O, and H are represented by silver, cyan, chocolate, gray, red, and pink balls, respectively.

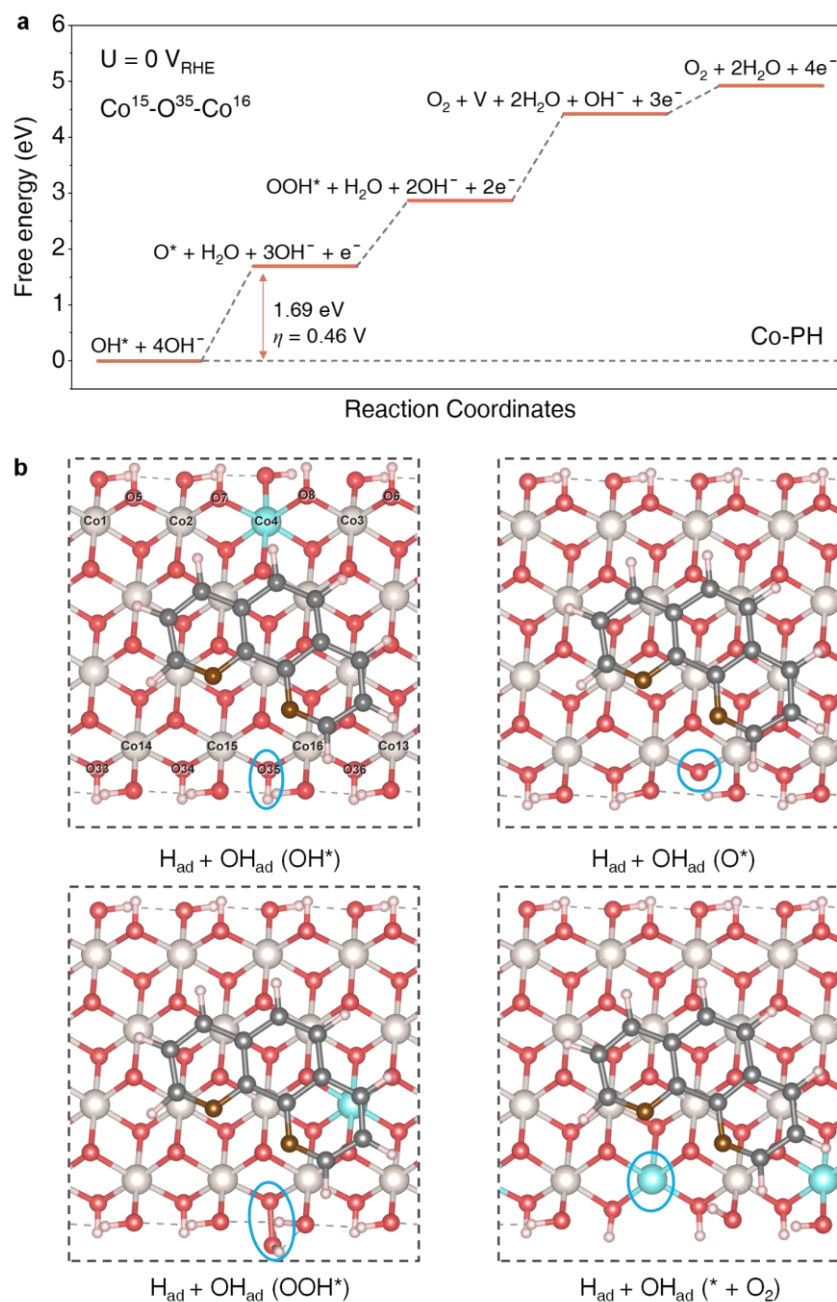

**Supplementary Fig. 68 | Reaction free-energy diagram of the  $\text{Co}^{15}\text{-O}^{35}\text{-Co}^{16}$  reaction site on the Co-PH at  $0 \text{ V}_{\text{RHE}}$ .** (a) The reaction free-energy diagram on the  $\text{Co}^{15}\text{-O}^{35}\text{-Co}^{16}$  reaction site on Co-PH and (b) the corresponding models. The reaction sites are shown with light blue circles.  $\text{Co}^{4+}$ ,  $\text{Co}^{3+}$ , N, C, O, and H are represented by silver, cyan, chocolate, gray, red, and pink balls, respectively.

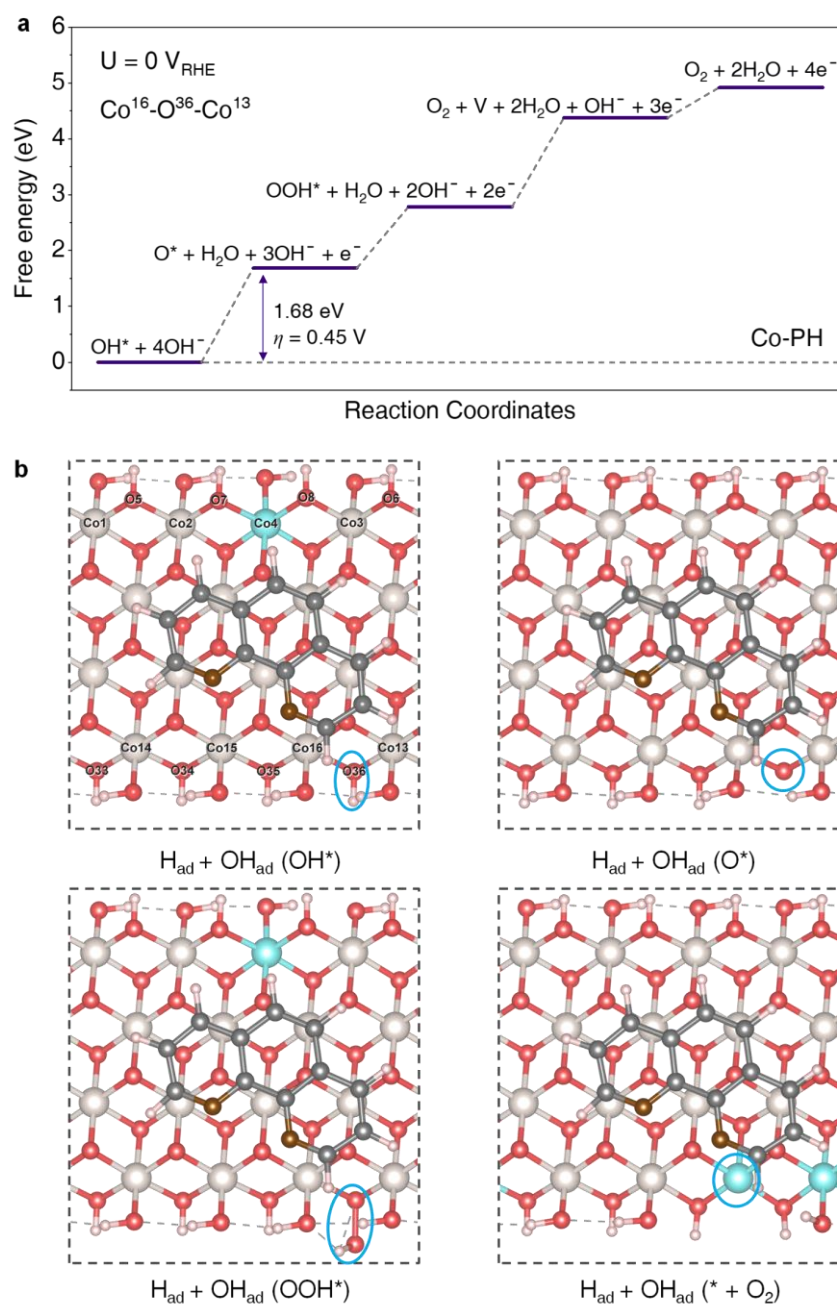

**Supplementary Fig. 69 | Reaction free-energy diagram of the  $\text{Co}^{16}\text{-O}^{36}\text{-Co}^{13}$  reaction site on the Co-PH at  $0 \text{ V}_{\text{RHE}}$ .** (a) The reaction free-energy diagram on the  $\text{Co}^{16}\text{-O}^{36}\text{-Co}^{13}$  reaction site on Co-PH and (b) the corresponding models. The reaction sites are shown with light blue circles.  $\text{Co}^{4+}$ ,  $\text{Co}^{3+}$ , N, C, O, and H are represented by silver, cyan, chocolate, gray, red, and pink balls, respectively.

## Supplementary References

- 1 Shimanouchi, T. *Tables of molecular vibrational frequencies, consolidated volume I*. NSRDS-NBS **39** (1972).
- 2 Huber, K. P. a. H., G. *Molecular spectra and molecular structure: IV Constants of diatomic molecules*. Van Nostrand Reinhold Co (1979).
- 3 Chase, M. *NIST-JANAF thermochemical tables*. 4th edn, American Institute of Physics (1998).
- 4 Zeng, Z. H. & Greeley, J. Characterization of oxygenated species at water/Pt(111) interfaces from DFT energetics and XPS simulations. *Nano Energy* **29**, 369-377 (2016).
- 5 Wang, L. *et al.* Core-shell nanostructured cobalt-platinum electrocatalysts with enhanced durability. *ACS Catal.* **8**, 35-42 (2018).
- 6 Dionigi, F. *et al.* In-situ structure and catalytic mechanism of NiFe and CoFe layered double hydroxides during oxygen evolution. *Nat. Commun.* **11**, 2522-2531 (2020).
- 7 Strmcnik, D. *et al.* The role of non-covalent interactions in electrocatalytic fuel-cell reactions on platinum. *Nat. Chem.* **1**, 466-472 (2009).
- 8 Muller-Dethlefs, K. & Hobza, P. Noncovalent interactions: a challenge for experiment and theory. *Chem. Rev.* **100**, 143-168 (2000).
- 9 Morisawa, Y., Ikehata, A., Higashi, N. & Ozaki, Y. Attenuated total reflectance-far ultraviolet (ATR-FUV) spectra of CH<sub>3</sub>OH, CH<sub>3</sub>OD, CD<sub>3</sub>OH and CD<sub>3</sub>OD in a liquid phase ~Rydberg states~. *Chem. Phys. Lett.* **476**, 205-208 (2009).
- 10 Higashi, N., Ikehata, A. & Ozaki, Y. An attenuated total reflectance far-UV spectrometer. *Rev. Sci. Instrum.* **78**, 103107-103112 (2007).
- 11 Kumar Trivedi, M. Thermal, spectroscopic and chromatographic characterization of Biofield energy treated benzophenone. *Sci. J. Anal. Chem.* **3**, 109-114 (2015)
- 12 Hoffmann, S. K., Goslar, J. & Lijewski, S. Electron paramagnetic resonance and electron spin echo studies of Co<sup>2+</sup> coordination by nicotinamide adenine dinucleotide (NAD<sup>+</sup>) in water solution. *Appl. Magn. Reson.* **44**, 817-826 (2013).
- 13 Kutin, Y., Cox, N., Lubitz, W., Schnegg, A. & Rudiger, O. In situ EPR characterization of a cobalt oxide water oxidation catalyst at neutral pH. *Catalysts* **9**, 926-936 (2019).

- 14 Dionigi, F. *et al.* Intrinsic electrocatalytic activity for oxygen evolution of crystalline 3d-transition metal layered double hydroxides. *Angew. Chem. Int. Ed.* **60**, 14446-14457 (2021).
- 15 Burke, M. S., Kast, M. G., Trotochaud, L., Smith, A. M. & Boettcher, S. W. Cobalt-iron (oxy)hydroxide oxygen evolution electrocatalysts: the role of structure and composition on activity, stability, and mechanism. *J. Am. Chem. Soc.* **137**, 3638-3648 (2015)
- 16 Yang, J., Liu, H. W., Martens, W. N. & Frost, R. L. Synthesis and characterization of cobalt hydroxide, cobalt oxyhydroxide, and cobalt oxide nanodiscs. *J. Phys. Chem. C* **114**, 111-119 (2010).
- 17 Petrie, J. R., Jeen, H., Barron, S. C., Meyer, T. L. & Lee, H. N. Enhancing perovskite electrocatalysis through strain tuning of the oxygen deficiency. *J. Am. Chem. Soc.* **138**, 7252-7255 (2016).
- 18 Dupin, J. C., Gonbeau, D., Benqlilou-Moudden, H., Vinatier, P. & Levasseur, A. XPS analysis of new lithium cobalt oxide thin-films before and after lithium deintercalation. *Thin Solid Films* **384**, 23-32 (2001).
- 19 Liu, B., Zhang, Y. & Tang, L. X-ray photoelectron spectroscopic studies of  $\text{Ba}_{0.5}\text{Sr}_{0.5}\text{Co}_{0.8}\text{Fe}_{0.2}\text{O}_{3-\delta}$  cathode for solid oxide fuel cells. *Int. J. Hydrog. Energy* **34**, 435-439 (2009).
- 20 Meng, C. *et al.* Laser synthesis of oxygen vacancy-modified  $\text{CoOOH}$  for highly efficient oxygen evolution. *Chem. Commun.* **55**, 2904-2907 (2019).
- 21 Artyushkova, K. *et al.* Density functional theory calculations of XPS binding energy shift for nitrogen-containing graphene-like structures. *Chem. Commun.* **49**, 2539-2541 (2013).
- 22 Thornton, D. A. & Watkins, G. M. A full vibrational assignment ( $4000\text{-}50\text{ cm}^{-1}$ ) of 1,10-phenanthroline and its perdeuterated analog. *Spectrochim. Acta A* **47**, 1085-1096 (1991).
- 23 Idir, B. & Kellou-Kerkouche, F. Experimental and theoretical studies on corrosion inhibition performance of phenanthroline for cast iron in acid solution. *J. Electrochem. Sci. Technol* **9**, 260-275 (2018).
- 24 Jagadale, A. D., Dubal, D. P. & Lokhande, C. D. Electrochemical behavior of potentiodynamically deposited cobalt oxyhydroxide ( $\text{CoOOH}$ ) thin films for supercapacitor application. *Mater. Res. Bull.* **47**, 672-676 (2012).

- 25 Nagaraju, G., Ko, Y. H. & Yu, J. S. Self-assembled hierarchical beta-cobalt hydroxide nanostructures on conductive textiles by one-step electrochemical deposition. *Crystengcomm* **16**, 11027-11034 (2014).
- 26 Subbaraman, R. *et al.* Trends in activity for the water electrolyser reactions on 3d M(Ni,Co,Fe,Mn) hydr(oxy)oxide catalysts. *Nat. Mater.* **11**, 550-557 (2012).
- 27 Li, Y. *et al.* Bifunctional porous cobalt phosphide foam for high current density alkaline water electrolysis with 4000 h long stability. *ACS Sustain. Chem. Eng.* **8**, 10193-10200 (2020).
- 28 Lee, C. *et al.* Atomically embedded Ag via electrodiffusion boosts oxygen evolution of CoOOH nanosheet arrays. *ACS Catal.* **10**, 562-569 (2020).
- 29 Zhang, S. L. *et al.* Metal atom-doped Co<sub>3</sub>O<sub>4</sub> hierarchical nanoplates for electrocatalytic oxygen evolution. *Adv. Mater.* **32**, 2002235-2002242 (2020).
- 30 Liu, C. *et al.* Oxygen evolution reaction over catalytic single-site Co in a well-defined brookite TiO<sub>2</sub> nanorod surface. *Nat. Catal.* **4**, 36-45 (2021).
- 31 Song, F. & Hu, X. L. Exfoliation of layered double hydroxides for enhanced oxygen evolution catalysis. *Nat. Commun.* **5**, 4477-4485 (2014).
- 32 Song, F. & Hu, X. Ultrathin cobalt-manganese layered double hydroxide is an efficient oxygen evolution catalyst. *J. Am. Chem. Soc.* **136**, 16481-16484 (2014).
- 33 Dionigi, F. *et al.* In-situ structure and catalytic mechanism of NiFe and CoFe layered double hydroxides during oxygen evolution. *Nat. Commun.* **11**, 2522-2531 (2020).
- 34 Wang, Y. Y. *et al.* Layered double hydroxide nanosheets with multiple vacancies obtained by dry exfoliation as highly efficient oxygen evolution electrocatalysts. *Angew. Chem. Int. Ed.* **56**, 5867-5871 (2017).
- 35 Zhang, B. *et al.* Homogeneously dispersed multimetal oxygen-evolving catalysts. *Science* **352**, 333-337 (2016).
- 36 Zhang, B. *et al.* High-valence metals improve oxygen evolution reaction performance by modulating 3d metal oxidation cycle energetics. *Nat. Catal.* **12**, 2203-2210 (2020).
- 37 Guo, F. *et al.* High-performance oxygen evolution electrocatalysis by boronized metal sheets with self-functionalized surfaces. *Energy Environ. Sci.* **12**, 684-692 (2019).

- 38 Ping, J. F. *et al.* Self-assembly of single-layer CoAl-layered double hydroxide nanosheets on 3D graphene network used as highly efficient electrocatalyst for oxygen evolution reaction. *Adv. Mater.* **28**, 7640-7645 (2016).
- 39 Wang, J. *et al.* Redirecting dynamic surface restructuring of a layered transition metal oxide catalyst for superior water oxidation. *Nat. Catal.* **4**, 212-222 (2021).
- 40 Li, X. *et al.* Adaptive bifunctional electrocatalyst of amorphous CoFe oxide @ 2D black phosphorus for overall water splitting. *Angew. Chem. Int. Ed.* **59**, 2-10 (2020).
- 41 Dou, Y. *et al.* Approaching the activity limit of CoSe<sub>2</sub> for oxygen evolution via Fe doping and Co vacancy. *Nat. Commun.* **11**, 1664-1672 (2020).
- 42 He, P., Yu, X. Y. & Lou, X. W. Carbon-incorporated nickel-cobalt mixed metal phosphide nanoboxes with enhanced electrocatalytic activity for oxygen evolution. *Angew. Chem. Int. Ed.* **56**, 3897-3900 (2017).
- 43 Qian, Q. Z., Li, Y. P., Liu, Y., Yu, L. & Zhang, G. Q. Ambient fast synthesis and active sites deciphering of hierarchical foam-like trimetal-organic framework nanostructures as a platform for highly efficient oxygen evolution electrocatalysis. *Adv. Mater.* **31**, 1901139-1901146 (2019).
- 44 Yang, H. *et al.* Preparation of nickel-iron hydroxides by microorganism corrosion for efficient oxygen evolution. *Nat. Commun.* **11**, 5075-5083 (2020).
